# Supplementary material for: Copper Coordination Chemistry of Sulfur Pendant Cyclen Derivatives: An Attempt to Hinder the Reductive-Induced Demetalation in 64/67Cu Radiopharmaceuticals
Source: PubMed Central journal article supplement (PMC8389837; doi:10.1021/acs.inorgchem.1c01550), 2021-07-19
Supplement: ic1c01550_si_001.pdf [file ic1c01550_si_001.pdf]

# Supporting Information

## Copper Coordination Chemistry of Sulfur Pendant Cyclen Derivatives: An Attempt to Hinder the Reductive-Induced Demetallation in $^{64/67}\text{Cu}$ Radiopharmaceuticals

Marianna Tosato<sup>1</sup>, Marco Dalla Tiezza<sup>1</sup>, Nóra V. May<sup>2</sup>, Abdirisak Ahmed Isse<sup>1</sup>, Sonia Nardella<sup>1,3</sup>, Laura Orian<sup>1</sup>, Marco Verona<sup>3</sup>, Christian Vaccarin<sup>3</sup>, André Alker<sup>4</sup>, Helmut Mäcke<sup>5</sup>, Paolo Pastore<sup>1</sup>, Valerio Di Marco<sup>1,\*</sup>

<sup>1</sup> Department of Chemical Sciences, University of Padova, via Marzolo 1, 35131 Padova, Italy

<sup>2</sup> Centre for Structural Science, Research Centre for Natural Sciences, 1117 Magyar Tudósok Körútja 2, Budapest, Hungary

<sup>3</sup> Department of Pharmaceutical Sciences, University of Padova, via Marzolo 8, 35131 Padova, Italy

<sup>4</sup> Roche Pharmaceutical Research and Early Development, Roche Innovation Center Basel F. Hoffmann-La Roche Ltd, Grenzacherstrasse 124, 4058 Basel, Switzerland

<sup>5</sup> Department of Nuclear Medicine, University Hospital Freiburg, Hugstetterstrasse 55, D-79106 Freiburg, Germany

\*Corresponding author: [valerio.dimarco@unipd.it](mailto:valerio.dimarco@unipd.it)

**Table S1.** Acidity constants ( $pK_a$  values) of DO4S, DO3S, DO3SAm, and DO2A2S. The reported uncertainty was obtained by the fitting procedure and represents one standard deviation unit. DOTA and cyclen were also included for comparison purpose.

| Ligand | Equilibrium <sup>(a)</sup>                     | $pK_a$                       |
|--------|------------------------------------------------|------------------------------|
| DO4S   | $H_3L^{3+} \rightleftharpoons H_2L^{2+} + H^+$ | $1.9 \pm 0.3$ <sup>(b)</sup> |
|        | $H_2L^{2+} \rightleftharpoons HL^+ + H^+$      | 7.29 <sup>(c)</sup>          |
|        | $HL^+ \rightleftharpoons L + H^+$              | 10.14 <sup>(c)</sup>         |
| DO3S   | $H_3L^{3+} \rightleftharpoons H_2L^{2+} + H^+$ | $2.0 \pm 0.1$ <sup>(b)</sup> |
|        | $H_2L^{2+} \rightleftharpoons HL^+ + H^+$      | 7.54 <sup>(c)</sup>          |
|        | $HL^+ \rightleftharpoons L + H^+$              | 10.86 <sup>(c)</sup>         |
| DO3SAm | $H_3L^{3+} \rightleftharpoons H_2L^{2+} + H^+$ | $1.9 \pm 0.2$ <sup>(b)</sup> |
|        | $H_2L^{2+} \rightleftharpoons HL^+ + H^+$      | 7.8 <sup>(c)</sup>           |
|        | $HL^+ \rightleftharpoons L + H^+$              | 10.42 <sup>(c)</sup>         |
| DO2A2S | $H_4L^{2+} \rightleftharpoons H_3L^+ + H^+$    | $1.8 \pm 0.1$ <sup>(b)</sup> |
|        | $H_3L^+ \rightleftharpoons H_2L + H^+$         | 3.44 <sup>(c)</sup>          |
|        | $H_2L \rightleftharpoons HL^- + H^+$           | 18.30 <sup>(c)</sup>         |
|        | $HL^- \rightleftharpoons L^{2-} + H^+$         |                              |
| DOTA   | $H_6L^{2+} \rightleftharpoons H_5L^+ + H^+$    | 1.34 <sup>(d)</sup>          |
|        | $H_5L^+ \rightleftharpoons H_4L + H^+$         | 2.29 <sup>(d)</sup>          |
|        | $H_4L \rightleftharpoons H_3L^- + H^+$         | 4.63 <sup>(e)</sup>          |
|        | $H_3L^- \rightleftharpoons H_2L^{2-} + H^+$    | 4.86 <sup>(e)</sup>          |
|        | $H_2L^{2-} \rightleftharpoons HL^{3-} + H^+$   | 9.18 <sup>(e)</sup>          |
|        | $HL^{3-} \rightleftharpoons L^{4-} + H^+$      | 11.43 <sup>(e)</sup>         |
| Cyclen | $H_4L^{4+} \rightleftharpoons H_3L^{3+} + H^+$ | 0.8 <sup>(f)</sup>           |
|        | $H_3L^{3+} \rightleftharpoons H_2L^{2+} + H^+$ | 1.6 <sup>(f)</sup>           |
|        | $H_2L^{2+} \rightleftharpoons HL^+ + H^+$      | 9.51 <sup>(c)</sup>          |
|        | $HL^+ \rightleftharpoons L + H^+$              | 10.63 <sup>(c)</sup>         |

<sup>(a)</sup> L denotes the ligand in its totally deprotonated form

<sup>(b)</sup> This work, no ionic strength control

<sup>(c)</sup> From ref. <sup>1</sup>,  $I = 0.15$  mol/L  $NaNO_3$ ,  $T = 25^\circ C$  (see reference list at the end of this file)

<sup>(d)</sup> From ref. <sup>2</sup>,  $I = 0.15$  mol/L  $(NMe_4)Cl$ ,  $T = 25^\circ C$

<sup>(e)</sup> From ref. <sup>3</sup>,  $I = 0.15$  mol/L  $NaCl$ ,  $T = 25^\circ C$

<sup>(f)</sup> From ref. <sup>4</sup>,  $I = 0.5$  mol/L  $KNO_3$ ,  $T = 25^\circ C$

**Table S2.** Approximate time required to reach equilibrium during the reaction between  $\text{Cu}^{2+}$  and ligand at various pH. Data were taken from **Figures S4 - S7**.

| pH  | Equilibration time |          |          |          |          |
|-----|--------------------|----------|----------|----------|----------|
|     | DO4S               | DO3S     | DO3SAm   | DO2A2S   | DOTA     |
| 2.0 | ~ 10 d             | ~ 10 d   | ~ 10 d   | ~ 4 h    | ~ 1 h    |
| 3.0 | ~ 20 h             | ~ 20 h   | ~ 10 h   | ~ 10 min | ~ 5 min  |
| 4.8 | ~ 50 min           | ~ 30 min | ~ 1 h    | < 10 sec | < 10 sec |
| 7.0 | < 10 sec           | < 10 sec | < 10 sec | < 10 sec | < 10 sec |

**Table S3.** Approximate time required to reach equilibrium during the reaction between  $\text{Cu}^{2+}$  and ligand at various pH. Higher concentrations than those of **Table S2** were employed for the reactants.

| pH      | Equilibration time |          |          |
|---------|--------------------|----------|----------|
|         | DO4S               | DO3S     | DO2A2S   |
| 2.0 (a) | –                  | –        | ~ 20 min |
| 3.0 (b) | ~ 2 h              | ~ 5 h    | < 1 min  |
| 4.8 (c) | ~ 3 min            | ~ 2 min  | < 10 sec |
| 7.0 (d) | < 10 sec           | < 10 sec | < 10 sec |

(a) pH 2.0:  $C_{\text{DO2A2S}} = C_{\text{Cu}^{2+}} = 1.0 \cdot 10^{-3}$  mol/L

(b) pH 3.0:  $C_{\text{DO4S}, \text{DO3S}} = C_{\text{Cu}^{2+}} = 9.0 \cdot 10^{-4}$  mol/L;  $C_{\text{DO2A2S}} = C_{\text{Cu}^{2+}} = 8.0 \cdot 10^{-4}$  mol/L

(c) pH 4.8:  $C_{\text{DO4S}} = C_{\text{Cu}^{2+}} = 1.2 \cdot 10^{-3}$  mol/L;  $C_{\text{DO3S}, \text{DO2A2S}} = C_{\text{Cu}^{2+}} = 1.1 \cdot 10^{-3}$  mol/L

(d) pH 7.0:  $C_{\text{DO4S}, \text{DO3S}, \text{DO2A2S}} = C_{\text{Cu}^{2+}} = 1.0 \cdot 10^{-3}$  mol/L

**Table S4.** UV-Vis spectroscopic data of the Cu<sup>2+</sup>-ligand complexes.

| Ligand | Complex           | Transition | $\lambda_{\max}$<br>(nm) | $\epsilon$ calculated <sup>(a)</sup><br>(L/cm·mol) |
|--------|-------------------|------------|--------------------------|----------------------------------------------------|
| DO4S   | CuL <sup>2+</sup> | CT         | 309                      | $(3.6 \pm 0.9) \cdot 10^3$                         |
|        |                   | <i>d-d</i> | 593                      | $5.3 \cdot 10^2$ <sup>(b)</sup>                    |
| DO3S   | CuL <sup>2+</sup> | CT         | 303                      | $(3.6 \pm 0.2) \cdot 10^3$                         |
|        |                   | <i>d-d</i> | 581                      | $4.3 \cdot 10^2$ <sup>(b)</sup>                    |
| DO3SAm | CuL <sup>2+</sup> | CT         | 304                      | $(3.7 \pm 0.8) \cdot 10^3$                         |
|        |                   | <i>d-d</i> | 602                      | $3.2 \cdot 10^2$ <sup>(b)</sup>                    |
| DO2A2S | CuL               | CT         | 272                      | $(5.0 \pm 0.2) \cdot 10^3$                         |
|        |                   | <i>d-d</i> | 715                      | $1.6 \cdot 10^2$ <sup>(b)</sup>                    |
|        | CuHL <sup>+</sup> | CT         | 303                      | $(4.0 \pm 0.9) \cdot 10^3$                         |
|        |                   | <i>d-d</i> | 680                      | –                                                  |

<sup>(a)</sup>: obtained from the UV-Vis data fitting aimed at the determination of the equilibrium constants.<sup>(b)</sup>: estimated from the spectra**Table S5.** Electronic and Gibbs free energies (in gas-phase and in water) for the Cyc4Me and DO4S complexes of Cu<sup>2+</sup>, supposing no sulfur coordination in the latter. All the energies are in kcal/mol. Level of theory: (COSMO-)ZORA-OPBE/TZ2P//ZORA-OPBE/TZP.

| Ligand | M                | Gas phase  |            | Water      |            |
|--------|------------------|------------|------------|------------|------------|
|        |                  | $\Delta E$ | $\Delta G$ | $\Delta E$ | $\Delta G$ |
| Cyc4Me | Cu <sup>2+</sup> | –402.5     | –387.1     | –198.4     | –183.0     |
| DO4S   |                  | –412.4     | –399.4     | –192.7     | –179.7     |

**Table S6.** Activation Strain Model (ASM) and Energy Decomposition Analysis (EDA) of the DO4S and DO3S complexes of Cu<sup>2+</sup> and Cu<sup>+</sup>. All the energies are in kcal/mol. Level of theory: ZORA-OPBE/TZ2P//ZORA-OPBE/TZP.

| M                | Ligand | coordination | $\Delta E$ | $\Delta E_{\text{strain}}$ | $\Delta E_{\text{int}}$ | $\Delta E_{\text{Pauli}}$ | $\Delta V_{\text{elstat}}$ | $\Delta E_{\text{oi}}$ |
|------------------|--------|--------------|------------|----------------------------|-------------------------|---------------------------|----------------------------|------------------------|
| Cu <sup>2+</sup> | DO4S   | [4N]         | -412.4     | 13.7                       | -426.1                  | 166.5                     | -234.6                     | -358.0                 |
|                  |        | [4N,S]       | -417.4     | 21.2                       | -438.6                  | 142.7                     | -228.3                     | -353.0                 |
|                  |        | [4N,2S]      | -410.1     | 27.3                       | -437.4                  | 96.6                      | -198.0                     | -336.1                 |
|                  | DO3S   | [4N]         | -411.4     | 12.4                       | -423.8                  | 168.2                     | -241.6                     | -350.4                 |
|                  |        | [4N,S]       | -418.1     | 21.1                       | -439.2                  | 153.0                     | -241.3                     | -350.9                 |
|                  |        | [4N,2S]      | -411.2     | 27.8                       | -439.0                  | 111.0                     | -214.3                     | -335.6                 |
| Cu <sup>+</sup>  | DO4S   | [4N]         | -117.3     | 5.6                        | -122.9                  | 157.3                     | -171.1                     | -109.0                 |
|                  |        | [4N,S]       | -128.3     | 13.7                       | -142.0                  | 161.0                     | -179.5                     | -123.5                 |
|                  |        | [4N,2S]      | -122.5     | 21.8                       | -144.3                  | 141.7                     | -164.9                     | -121.2                 |
|                  | DO3S   | [4N]         | -119.7     | 4.9                        | -124.5                  | 158.9                     | -176.3                     | -107.2                 |
|                  |        | [4N,S]       | -130.6     | 13.4                       | -144.1                  | 160.3                     | -182.3                     | -122.1                 |
|                  |        | [4N,2S]      | -126.2     | 18.0                       | -144.2                  | 140.7                     | -166.4                     | -118.5                 |

**Table S7.** Crystallographic data and refinement details for [Cu(DO4S)(NO<sub>3</sub>)]·(NO<sub>3</sub>).

|                              |                                                                                |             |
|------------------------------|--------------------------------------------------------------------------------|-------------|
| Empirical formula            | C <sub>20</sub> H <sub>44</sub> CuN <sub>6</sub> O <sub>6</sub> S <sub>4</sub> |             |
| Formula weight               | 656.39 g/mol                                                                   |             |
| Temperature                  | 183 (2)                                                                        |             |
| Radiation and wavelength     | Mo-Kα, λ = 0.71073 Å                                                           |             |
| Crystal system               | Monoclinic                                                                     |             |
| Space group                  | P2 (1)                                                                         |             |
| Unit cell dimension          | a = 8.128 Å                                                                    | α = 90.0°   |
|                              | b = 14.879 Å                                                                   | β = 102.86° |
|                              | c = 12.373 Å,                                                                  | γ = 90.0°   |
| Volume                       | 1458.8 Å <sup>3</sup>                                                          |             |
| Z                            | 2                                                                              |             |
| Density (calculated)         | 1.494 Mg/cm <sup>3</sup>                                                       |             |
| Absorption coefficient, μ    | 1.080 mm <sup>-1</sup>                                                         |             |
| F(000)                       | 694                                                                            |             |
| Crystal colour               | blue                                                                           |             |
| Crystal size                 | 0.6 × 0.4 × 0.4 mm                                                             |             |
| θ area data collection       | 1.69 to 27.52°                                                                 |             |
| Index area                   | 0 ≤ h ≤ 10, 0 ≤ k ≤ 19, -16 ≤ l ≤ 15                                           |             |
| Reflections collected        | 3760                                                                           |             |
| Independent reflections      | 3462 [R(int) = 0.02951]                                                        |             |
| Refinement method            | Full-matrix least squares on F <sup>2</sup>                                    |             |
| Data/restraints/parameters   | 3462/1/336                                                                     |             |
| Final R indices [I < 2σ(I)]  | R <sub>1</sub> = 0.0570, wR <sub>2</sub> = 0.1387                              |             |
| R indices (all data)         | R <sub>1</sub> = 0.0736, wR <sub>2</sub> = 0.1527                              |             |
| Absolute structure parameter | 0.00 ± 3                                                                       |             |
| Extinction coefficient       | 0.00 ± 2                                                                       |             |
| Differential signals         | 0.842 and -0.575 e.Å <sup>-3</sup>                                             |             |

$$R_1 = \frac{\sum ||F_o| - |F_c||}{\sum |F_o|}$$

$$wR_2 = \left\{ \frac{\sum [w(|F_o|^2 - |F_c|^2)]^2}{\sum [w(F_o^4)]} \right\}^{1/2}$$

**Table S8.** Bond lengths of [Cu(DO4S)(NO<sub>3</sub>)]·(NO<sub>3</sub>).

| <b>Bond</b> | <b>Bond length [Å]</b> | <b>Bond</b> | <b>Bond length [Å]</b> |
|-------------|------------------------|-------------|------------------------|
| Cu(1)-N(5)  | 2.029(7)               | S(7)-C(16)  | 1.773(10)              |
| Cu(1)-N(3)  | 2.035(7)               | S(8)-C(22)  | 1.784(11)              |
| Cu(1)-N(2)  | 2.053(7)               | S(8)-C(21)  | 1.805(10)              |
| Cu(1)-N(4)  | 2.057(7)               | S(9)-C(27)  | 1.690(2)               |
| Cu(1)-O(31) | 2.149(6)               | S(9)-C(26)  | 1.799(10)              |
| N(2)-C(13)  | 1.447(12)              | C(10)-C(11) | 1.525(11)              |
| N(2)-C(10)  | 1.469(10)              | C(13)-C(14) | 1.420(2)               |
| N(2)-C(29)  | 1.599(13)              | C(15)-C(16) | 1.518(11)              |
| N(3)-C(18)  | 1.425(12)              | C(18)-C(19) | 1.423(14)              |
| N(3)-C(15)  | 1.477(10)              | C(20)-C(21) | 1.524(12)              |
| N(3)-C(14)  | 1.611(12)              | C(23)-C(24) | 1.453(13)              |
| N(4)-C(23)  | 1.459(12)              | C(25)-C(26) | 1.515(13)              |
| N(4)-C(20)  | 1.482(10)              | C(28)-C(29) | 1.447(14)              |
| N(4)-C(19)  | 1.573(12)              | N(39)-O(33) | 1.168(14)              |
| N(5)-C(28)  | 1.470(12)              | N(30)-O(32) | 1.174(14)              |
| N(5)-C(25)  | 1.482(10)              | N(30)-O(31) | 1.229(9)               |
| N(5)-C(24)  | 1.579(13)              | N(34)-O(35) | 1.194(11)              |
| S(6)-C(12)  | 1.765(11)              | N(34)-O(36) | 1.228(12)              |
| S(6)-C(11)  | 1.811(9)               | N(34)-O(37) | 1.245(10)              |
| S(7)-C(17)  | 1.736(14)              |             |                        |

**Table S9.** Bond angles of [Cu(DO4S)(NO<sub>3</sub>)]·(NO<sub>3</sub>).

| Angle                          | [°]      | Angle             | [°]       |
|--------------------------------|----------|-------------------|-----------|
| N(5)-Cu(1)-N(3)                | 151.9(3) | C(25)-N(5)-C(24)  | 110.4(7)  |
| N(5)-Cu(1)-N(2)                | 86.8(3)  | C(28)-N(5)-Cu(1)  | 101.9(6)  |
| N(3)-Cu(1)-N(2)                | 86.7(3)  | C(25)-N(5)-Cu(1)  | 114.4(5)  |
| N(5)-Cu(1)-N(4)                | 87.6(3)  | C(24)-N(5)-Cu(1)  | 103.3(5)  |
| N(3)-Cu(1)-N(4)                | 84.8(3)  | C(12)-S(6)-C(11)  | 101.4(5)  |
| N(2)-Cu(1)-N(4)                | 150.7(3) | C(17)-S(7)-C(16)  | 102.1(8)  |
| N(5)-Cu(1)-O(31)               | 104.6(3) | C(22)-S(8)-C(21)  | 100.9(8)  |
| N(3)-Cu(1)-O(31)               | 103.3(3) | C(27)-S(9)-C(26)  | 99.7(8)   |
| N8 <sup>''</sup> )-Cu(1)-O(31) | 110.5(3) | N(2)-C(10)-C(11)  | 114.2(6)  |
| N(4)-Cu(1)-O(31)               | 98.7(3)  | C(10)-C(11)-S(6)  | 109.8(6)  |
| C(13)-N(2)-C(10)               | 115.8(7) | C(14)-C(13)-N(2)  | 108.4(8)  |
| C(13)-N(2)-C(29)               | 110.9(8) | C(13)-C(14)-N(3)  | 111.0(8)  |
| C(10)-N(2)-C(29)               | 108.8(7) | N(3)-C(15)-C(16)  | 115.6(6)  |
| C(13)-N(2)-Cu(1)               | 102.0(6) | C(15)-C(16)-S(7)  | 111.9(6)  |
| C(10)-N(2)-Cu(1)               | 115.4(5) | C(19)-C(18)-N(3)  | 108.2(8)  |
| C(29)-N(2)-Cu(1)               | 103.1(5) | C(18)-C(19)-N(4)  | 111.2(7)  |
| C(18)-N(3)-C(15)               | 116.6(7) | N(4)-C(20)-C(21)  | 114.2(7)  |
| C(18)-N(3)-C(14)               | 109.2(7) | C(20)-C(21)-S(8)  | 109.2(6)  |
| C(15)-N(3)-C(14)               | 108.8(7) | C(24)-C(23)-N(4)  | 108.8(7)  |
| C(18)-N(3)-Cu(1)               | 102.7(6) | C(23)-C(24)-N(5)  | 110.9(7)  |
| C(15)-N(3)-Cu(1)               | 116.0(4) | N(5)-C(25)-C(26)  | 114.2(7)  |
| C(14)-N(3)-Cu(1)               | 102.6(5) | C(25)-C(26)-S(9)  | 112.1(7)  |
| C(23)-N(4)-C(20)               | 114.1(7) | C(29)-C(28)-N(5)  | 110.5(9)  |
| C(23)-N(4)-C(19)               | 111.2(7) | O(33)-N(30)-O(32) | 120.6(12) |
| C(20)-N(4)-C(19)               | 110.7(7) | O(33)-N(30)-O(31) | 118.2(11) |
| C(23)-N(4)-Cu(1)               | 101.1(5) | O(32)-N(30)-O(31) | 120.0(11) |
| C(20)-N(4)-Cu(1)               | 115.3(5) | N(30)-O(31)-Cu(1) | 136.1(5)  |
| C(19)-N(4)-Cu(1)               | 103.5(5) | O(35)-N(34)-O(36) | 120.0(9)  |
| C(28)-N(5)-C(25)               | 115.4(8) | O(35)-N(34)-O(37) | 120.2(9)  |
| C(28)-N(5)-C(24)               | 110.5(7) | O(36)-N(34)-O(37) | 119.7(8)  |



**Table S10.** Crystal data and structure refinement for [Cu(DO2A2S)].

|                                             |                                                                                                                                       |
|---------------------------------------------|---------------------------------------------------------------------------------------------------------------------------------------|
| Empirical formula                           | C <sub>18</sub> H <sub>34</sub> CuN <sub>4</sub> O <sub>4</sub> S <sub>2</sub>                                                        |
| Formula weight                              | 498.15                                                                                                                                |
| Temperature                                 | 295(2)                                                                                                                                |
| Radiation and wavelength                    | Mo-K $\alpha$ , $\lambda$ = 0.71073 Å                                                                                                 |
| Crystal system                              | monoclinic                                                                                                                            |
| Space group                                 | <i>I</i> 2                                                                                                                            |
| Unit cell dimensions                        | $a = 16.1921(10)$ Å $\alpha = 90.0^\circ$<br>$b = 6.7295(4)$ Å $\beta = 91.554(10)^\circ$<br>$c = 19.970(3)$ Å, $\gamma = 90.0^\circ$ |
| Volume                                      | 2175.2(4) Å <sup>3</sup>                                                                                                              |
| Z/Z'                                        | 4/1                                                                                                                                   |
| Density (calculated)                        | 1.521 Mg/m <sup>3</sup>                                                                                                               |
| Absorption coefficient, $\mu$               | 1.228 mm <sup>-1</sup>                                                                                                                |
| <i>F</i> (000)                              | 1052                                                                                                                                  |
| Crystal colour                              | blue                                                                                                                                  |
| Crystal description                         | block                                                                                                                                 |
| Crystal size                                | 0.30 × 0.30 × 0.20 mm                                                                                                                 |
| Absorption correction                       | numerical                                                                                                                             |
| Max. and min. transmission                  | 0.928, 0.966                                                                                                                          |
| $\theta$ range for data collection          | $3.195 \leq \theta \leq 27.468^\circ$                                                                                                 |
| Index ranges                                | $-20 \leq h \leq 20$ ; $-8 \leq k \leq 8$ ; $-25 \leq l \leq 25$                                                                      |
| Reflections collected                       | 23317                                                                                                                                 |
| Completeness to $2\theta$                   | 0.998                                                                                                                                 |
| Independent reflections                     | 4964 [ <i>R</i> (int) = 0.0421]                                                                                                       |
| Reflections $I > 2\sigma(I)$                | 4599                                                                                                                                  |
| Refinement method                           | full-matrix least-squares on <i>F</i> <sup>2</sup>                                                                                    |
| Data / restraints / parameters              | 4964 / 1 / 266                                                                                                                        |
| Goodness-of-fit on <i>F</i> <sup>2</sup>    | 1.038                                                                                                                                 |
| Final <i>R</i> indices [ $I > 2\sigma(I)$ ] | <i>R</i> <sub>1</sub> = 0.0298, <i>wR</i> <sub>2</sub> = 0.0616                                                                       |
| <i>R</i> indices (all data)                 | <i>R</i> <sub>1</sub> = 0.0345, <i>wR</i> <sub>2</sub> = 0.0628                                                                       |
| Max. and mean shift/esd                     | 0.000; 0.000                                                                                                                          |
| Largest diff. peak and hole                 | 0.396; -0.202 e.Å <sup>-3</sup>                                                                                                       |

**Table S11.** Bond lengths for [Cu(DO2A2S)].

| <b>Bond</b> | <b>Bond length [Å]</b> | <b>Bond</b> | <b>Bond length [Å]</b> |
|-------------|------------------------|-------------|------------------------|
| Cu1-O1#1    | 1.954(2)               | Cu1-O1      | 1.955(2)               |
| Cu1-N1#1    | 2.150(3)               | Cu1-N1      | 2.150(3)               |
| S1-C9       | 1.789(4)               | S1-C8       | 1.813(3)               |
| O1-C6       | 1.283(4)               | O2-C6       | 1.231(4)               |
| N1-C5       | 1.481(4)               | N1-C3       | 1.482(4)               |
| N1-C4#1     | 1.490(4)               | N2-C2       | 1.461(4)               |
| N2-C1       | 1.476(4)               | N2-C7       | 1.478(4)               |
| C1-C4       | 1.514(4)               | C2-C3       | 1.521(5)               |
| C5-C6       | 1.510(5)               | C7-C8       | 1.515(5)               |
| Cu2-O3#2    | 1.955(2)               | Cu2-O3      | 1.955(2)               |
| Cu2-N3#2    | 2.110(3)               | Cu2-N3      | 2.110(3)               |
| Cu2-N4#2    | 2.336(3)               | Cu2-N4      | 2.336(3)               |
| S2-C19      | 1.785(4)               | S2-C18      | 1.812(4)               |
| O3-C16      | 1.277(4)               | O4-C16      | 1.229(4)               |
| N3-C15      | 1.485(4)               | N3-C12      | 1.489(4)               |
| N3-C11      | 1.490(4)               | N4-C14      | 1.463(4)               |
| N4-C13      | 1.479(4)               | N4-C17      | 1.489(4)               |
| C11-C14#2   | 1.523(4)               | C12-C13     | 1.528(5)               |
| C15-C16     | 1.526(5)               | C17-C18     | 1.521(4)               |

**Table S12.** Bond angles for [Cu(DO2A2S)].

| Angle         | [°]       | Angle         | [°]       |
|---------------|-----------|---------------|-----------|
| O1#1-Cu1-O1   | 87.0(1)   | O1#1-Cu1-N1#1 | 80.3(1)   |
| O1-Cu1-N1#1   | 157.49(9) | O1#1-Cu1-N1   | 157.49(9) |
| O1-Cu1-N1     | 80.3(1)   | N1#1-Cu1-N1   | 117.2(2)  |
| C9-S1-C8      | 101.2(2)  | C6-O1-Cu1     | 118.0(2)  |
| C5-N1-C3      | 110.3(2)  | C5-N1-C4#1    | 107.1(3)  |
| C3-N1-C4#1    | 110.8(3)  | C5-N1-Cu1     | 102.5(2)  |
| C3-N1-Cu1     | 114.5(2)  | C4#1-N1-Cu1   | 111.1(2)  |
| C2-N2-C1      | 109.9(2)  | C2-N2-C7      | 111.4(2)  |
| C1-N2-C7      | 110.1(2)  | N2-C1-C4      | 111.1(2)  |
| N2-C2-C3      | 110.9(2)  | N1-C3-C2      | 111.6(3)  |
| N1#1-C4-C1    | 112.0(3)  | N1-C5-C6      | 110.4(2)  |
| O2-C6-O1      | 125.3(3)  | O2-C6-C5      | 119.6(3)  |
| O1-C6-C5      | 115.1(3)  | N2-C7-C8      | 112.5(3)  |
| C7-C8-S1      | 112.9(2)  | O3#2-Cu2-O3   | 89.6(1)   |
| O3#2-Cu2-N3#2 | 84.1(1)   | O3-Cu2-N3#2   | 169.4(1)  |
| O3#2-Cu2-N3   | 169.4(1)  | O3-Cu2-N3     | 84.1(1)   |
| N3#2-Cu2-N3   | 103.3(2)  | O3#2-Cu2-N4#2 | 107.21(9) |
| O3-Cu2-N4#2   | 94.2(1)   | N3#2-Cu2-N4#2 | 79.70(9)  |
| N3-Cu2-N4#2   | 81.75(9)  | O3#2-Cu2-N4   | 94.2(1)   |
| O3-Cu2-N4     | 107.21(9) | N3#2-Cu2-N4   | 81.75(9)  |
| N3-Cu2-N4     | 79.70(9)  | N4#2-Cu2-N4   | 149.9(1)  |
| C19-S2-C18    | 102.2(2)  | C16-O3-Cu2    | 117.2(2)  |
| C15-N3-C12    | 111.2(2)  | C15-N3-C11    | 111.2(3)  |
| C12-N3-C11    | 110.4(3)  | C15-N3-Cu2    | 104.3(2)  |
| C12-N3-Cu2    | 109.7(2)  | C11-N3-Cu2    | 109.8(2)  |
| C14-N4-C13    | 114.6(3)  | C14-N4-C17    | 113.2(3)  |
| C13-N4-C17    | 112.5(2)  | C14-N4-Cu2    | 101.4(2)  |
| C13-N4-Cu2    | 107.6(2)  | C17-N4-Cu2    | 106.5(2)  |
| N3-C11-C14#2  | 111.3(2)  | N3-C12-C13    | 112.0(3)  |
| N4-C13-C12    | 113.4(2)  | N4-C14-C11#2  | 111.4(2)  |
| N3-C15-C16    | 113.7(3)  | O4-C16-O3     | 125.8(4)  |
| O4-C16-C15    | 118.1(3)  | O3-C16-C15    | 116.0(3)  |
| N4-C17-C18    | 115.2(3)  | C17-C18-S2    | 111.1(2)  |

Symmetry codes to generate equivalent atoms: #1 -x+1,y,-z+1 and #2 -x+2,y,-z+1

**Table S13.**  $^1\text{H}$ -NMR resonance assignments for the  $\text{Cu}^+$  complexes formed by DO4S and DO2A2S (400 MHz, RT,  $\text{H}_2\text{O} + 10\% \text{D}_2\text{O}$ ).

| Complex               | Signal (ppm) | Multiplicity | Area | Proton Assignment                                            |
|-----------------------|--------------|--------------|------|--------------------------------------------------------------|
| $\text{Cu}^+$ -DO4S   | 2.20         | s            | 12   | $\text{SCH}_3$                                               |
|                       | 2.72         | s broad      | 16   | $\text{SCH}_2 + \text{NCH}_2$ arms<br>or $\text{NCH}_2$ ring |
|                       | 2.82         | s broad      | 16   | $\text{NCH}_2$ ring<br>or $\text{SCH}_2 + \text{NCH}_2$ arms |
| $\text{Cu}^+$ -DO2A2S | 2.28         | s            | 6    | $\text{SCH}_3$                                               |
|                       | 2.71         | m            | 4    | $\text{SCH}_2$                                               |
|                       | 2.80         | t            | 8    | $\text{NCH}_2$ ring                                          |
|                       | 2.92         | m            | 4    | $\text{NCH}_2$                                               |
|                       | 2.94         | t            | 8    | $\text{NCH}_2$ ring                                          |
|                       | 3.41         | s            | 4    | $\text{CH}_2\text{COOH}$                                     |

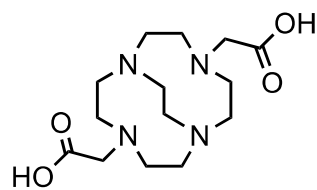

**CB-DO2A**

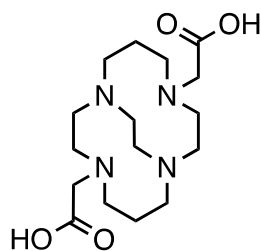

**CB-TE2A**

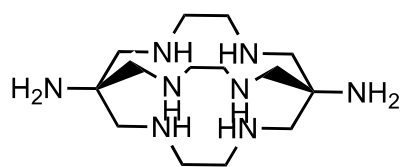

**DiamSar**

**Figure S1.** CB-DO2A, CB-TE2A and DiamSar.

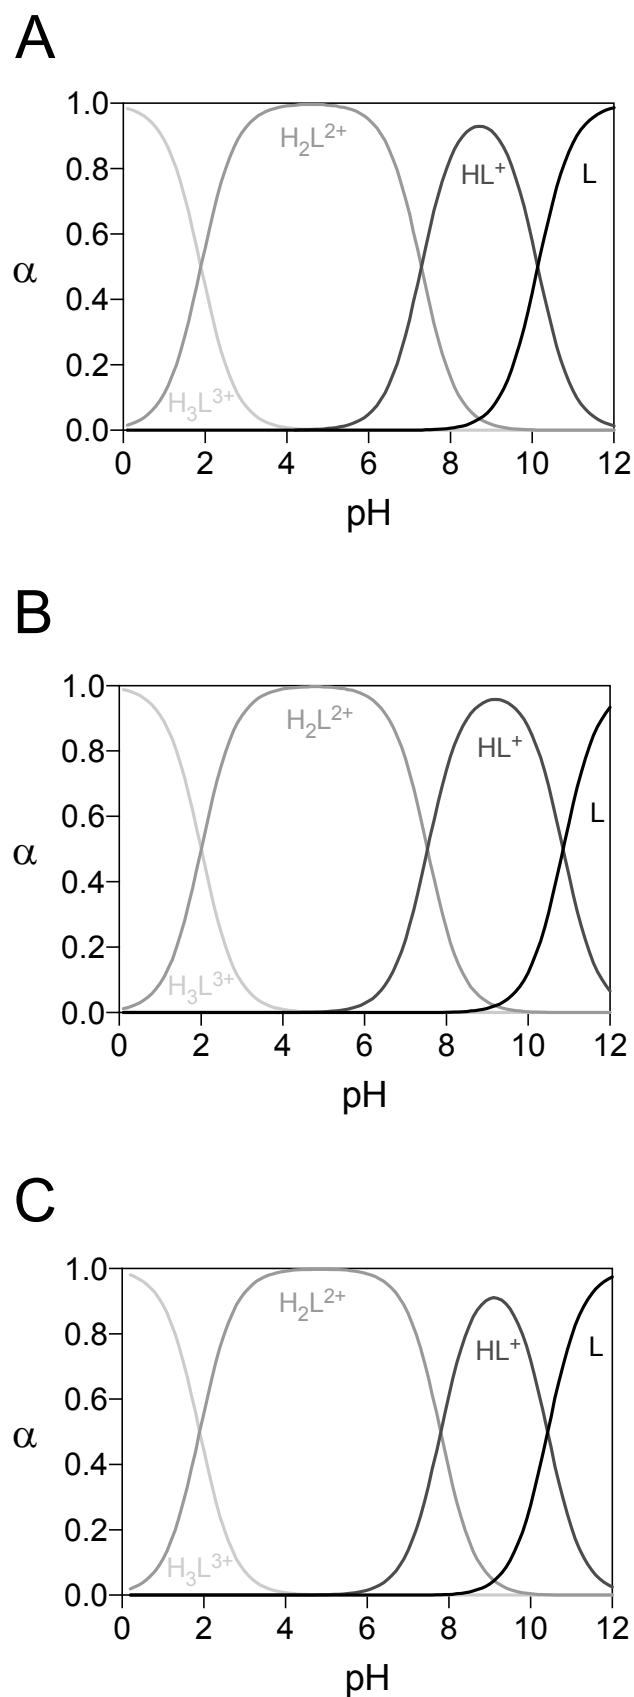

**Figure S2.** Distribution diagram of (A) DO4S, (B) DO3S and (C) DO3SAm, calculated using the protonation constants listed in **Table S1**.

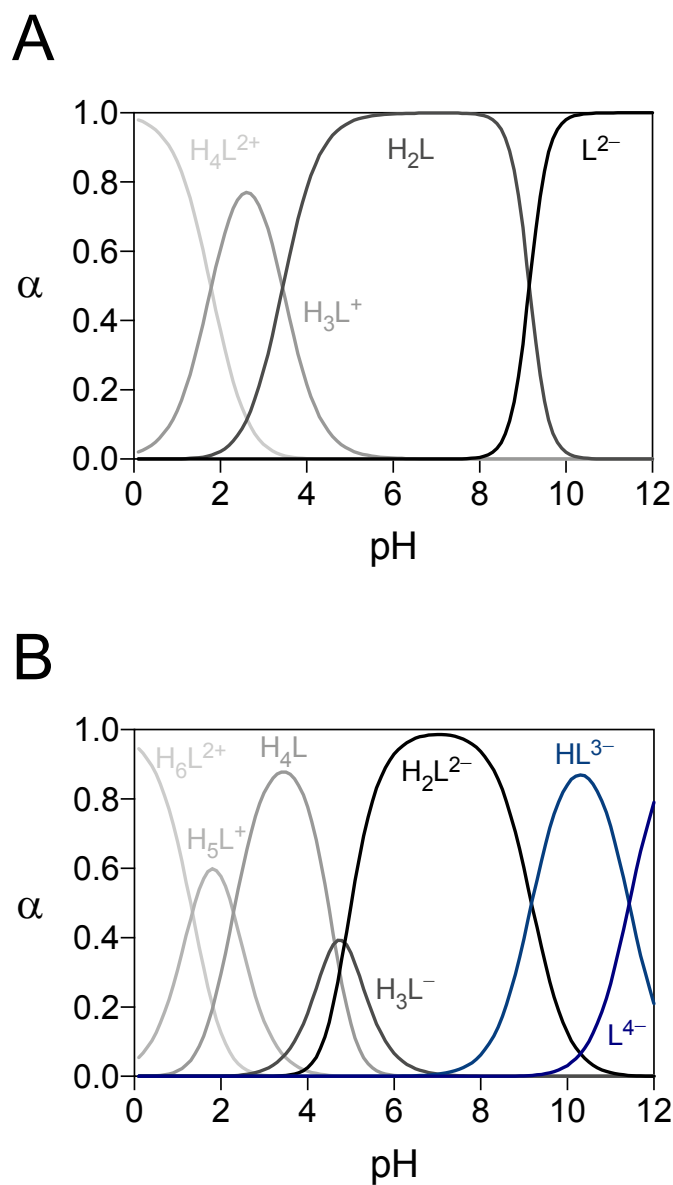

**Figure S3.** Distribution diagram of (A) DO2A2S and (B) DOTA calculated using the protonation constants listed in **Table S1**.

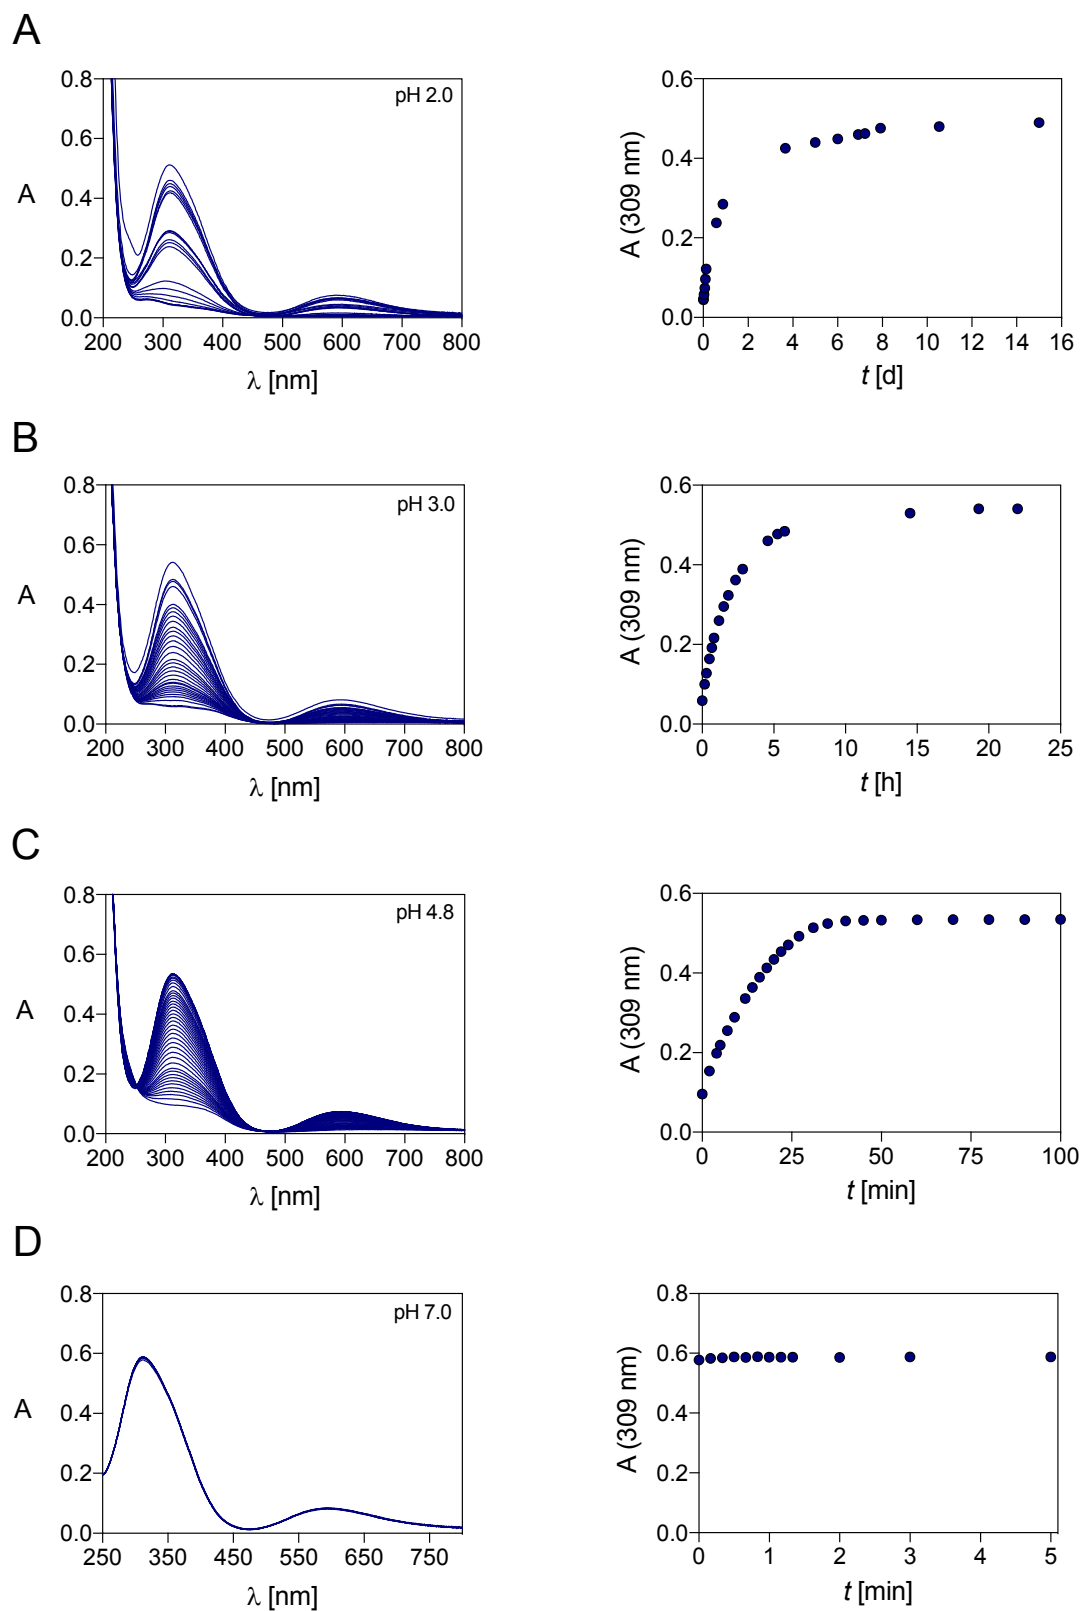

**Figure S4.** UV-Vis spectra (left) and time course (right) of the  $\text{Cu}^{2+}$ -DO4S complex formation at (A) pH 2.0 ( $C_{\text{DO4S}} = C_{\text{Cu}^{2+}} = 1.2 \cdot 10^{-4} \text{ mol/L}$ ), (B) pH 3.0 ( $C_{\text{DO4S}} = C_{\text{Cu}^{2+}} = 1.5 \cdot 10^{-4} \text{ mol/L}$ ), (C) pH 4.8 ( $C_{\text{DO4S}} = C_{\text{Cu}^{2+}} = 1.3 \cdot 10^{-4} \text{ mol/L}$ ) and (D) pH 7.0 ( $C_{\text{DO4S}} = C_{\text{Cu}^{2+}} = 1.5 \cdot 10^{-4} \text{ mol/L}$ ).



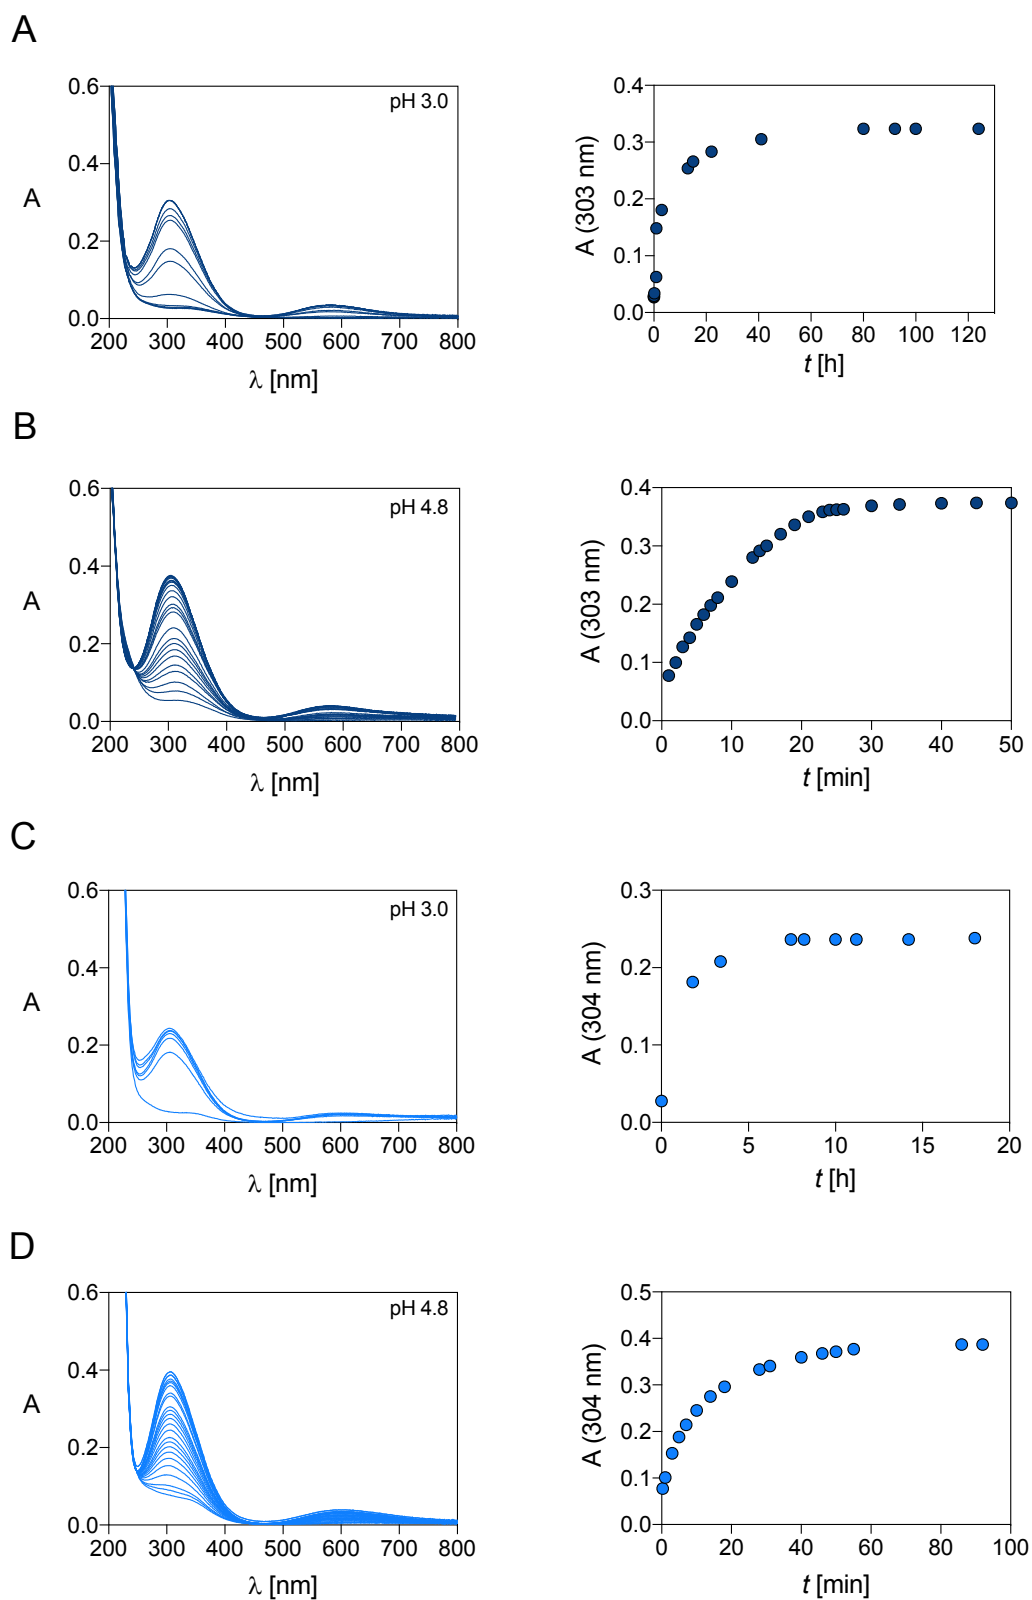

**Figure S5.** UV-Vis spectra (left) and time course (right) of the  $\text{Cu}^{2+}$  complex formation with: (A) DO3S at pH 3.0 ( $C_{\text{DO3S}} = C_{\text{Cu}^{2+}} = 1.0 \cdot 10^{-4}$  mol/L); (B) DO3S at pH 4.8 ( $C_{\text{DO3S}} = C_{\text{Cu}^{2+}} = 1.2 \cdot 10^{-4}$  mol/L); (C) DO3SAm at pH 3.0 ( $C_{\text{DO3SAm}} = C_{\text{Cu}^{2+}} = 0.8 \cdot 10^{-4}$  mol/L); (D) DO3SAm at pH 4.8 ( $C_{\text{DO3SAm}} = C_{\text{Cu}^{2+}} = 1.1 \cdot 10^{-4}$  mol/L).

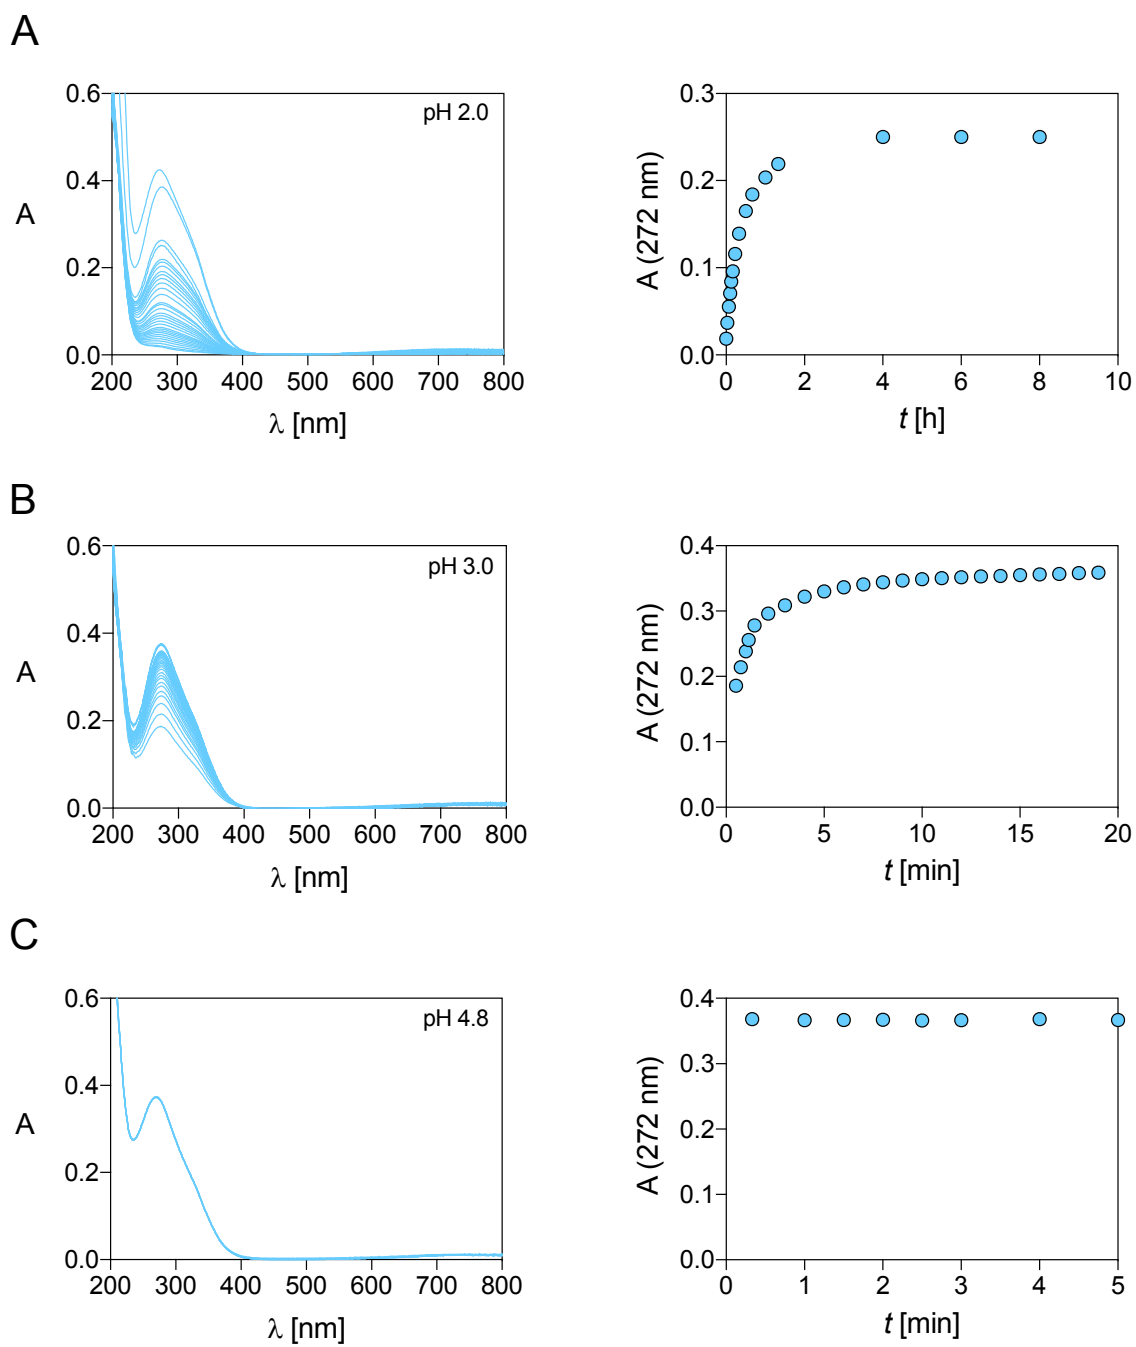

**Figure S6.** UV-Vis spectra (left) and time course (right) of the  $\text{Cu}^{2+}$ -DO2A2S complex formation at (A) pH 2.0 ( $C_{\text{DO2A2S}} = C_{\text{Cu}^{2+}} = 0.8 \cdot 10^{-4}$  mol/L), (B) pH 3.0 ( $C_{\text{DO2A2S}} = C_{\text{Cu}^{2+}} = 0.8 \cdot 10^{-4}$  mol/L) and (C) pH 4.8 ( $C_{\text{DO2A2S}} = C_{\text{Cu}^{2+}} = 1.1 \cdot 10^{-4}$  mol/L).

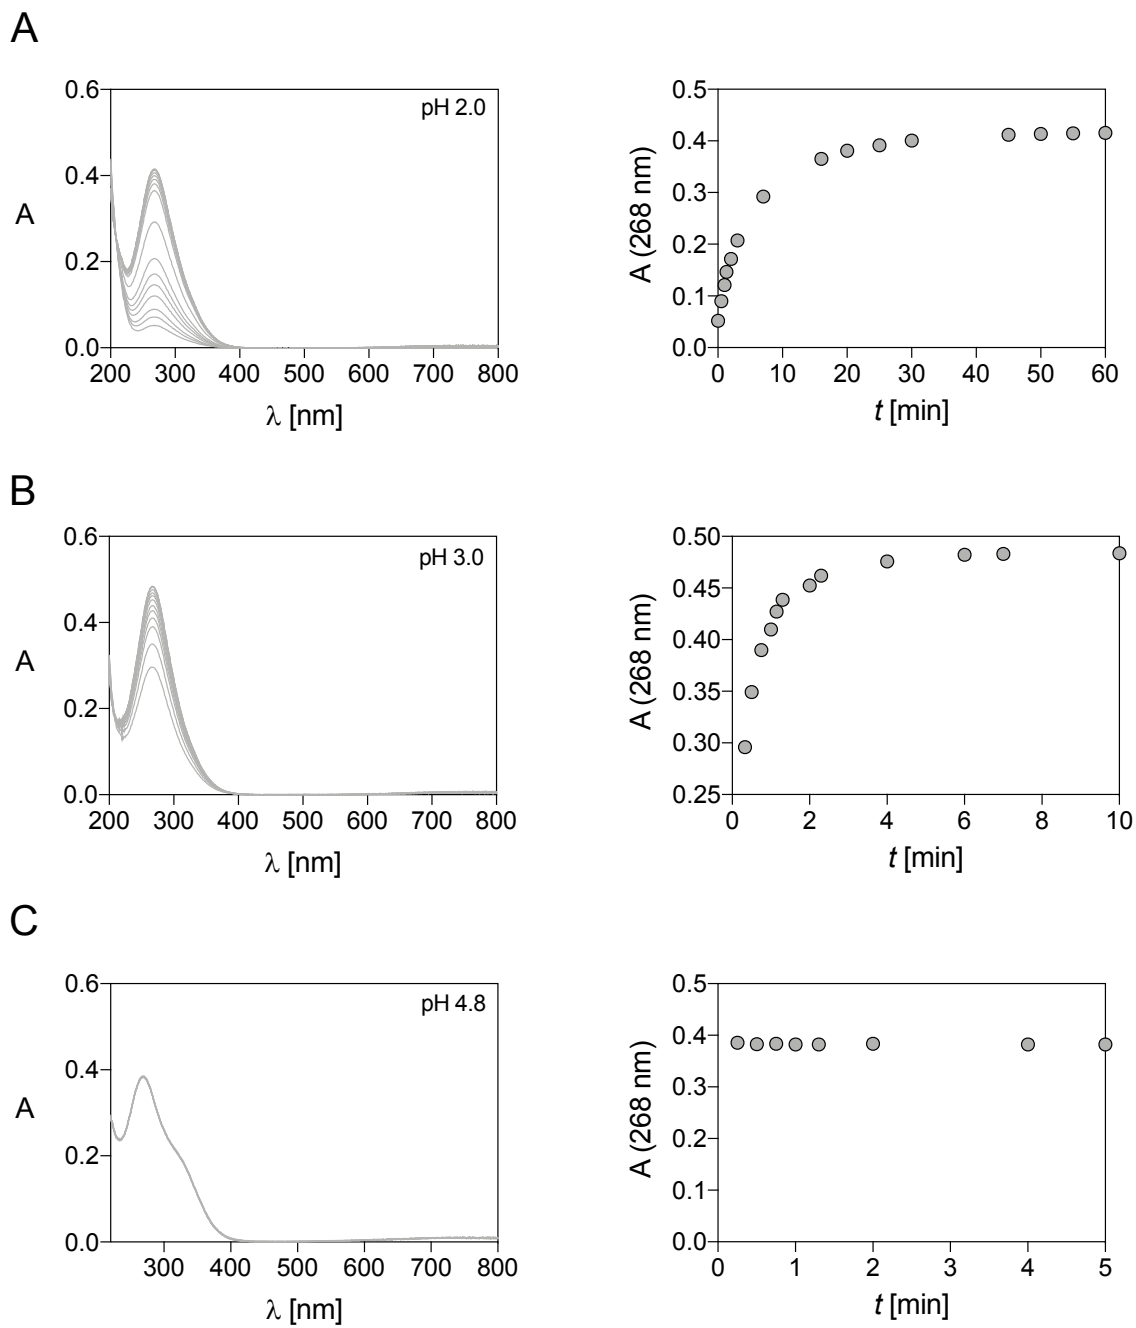

**Figure S7.** UV-Vis spectra (left) and time course (right) of the  $\text{Cu}^{2+}$ -DOTA complex formation at (A) pH 2.0 ( $C_{\text{DOTA}} = C_{\text{Cu}^{2+}} = 1.0 \cdot 10^{-4}$  mol/L), (B) pH 3.0 ( $C_{\text{DOTA}} = C_{\text{Cu}^{2+}} = 1.0 \cdot 10^{-4}$  mol/L) and (C) pH 4.8 ( $C_{\text{DOTA}} = C_{\text{Cu}^{2+}} = 1.0 \cdot 10^{-4}$  mol/L).

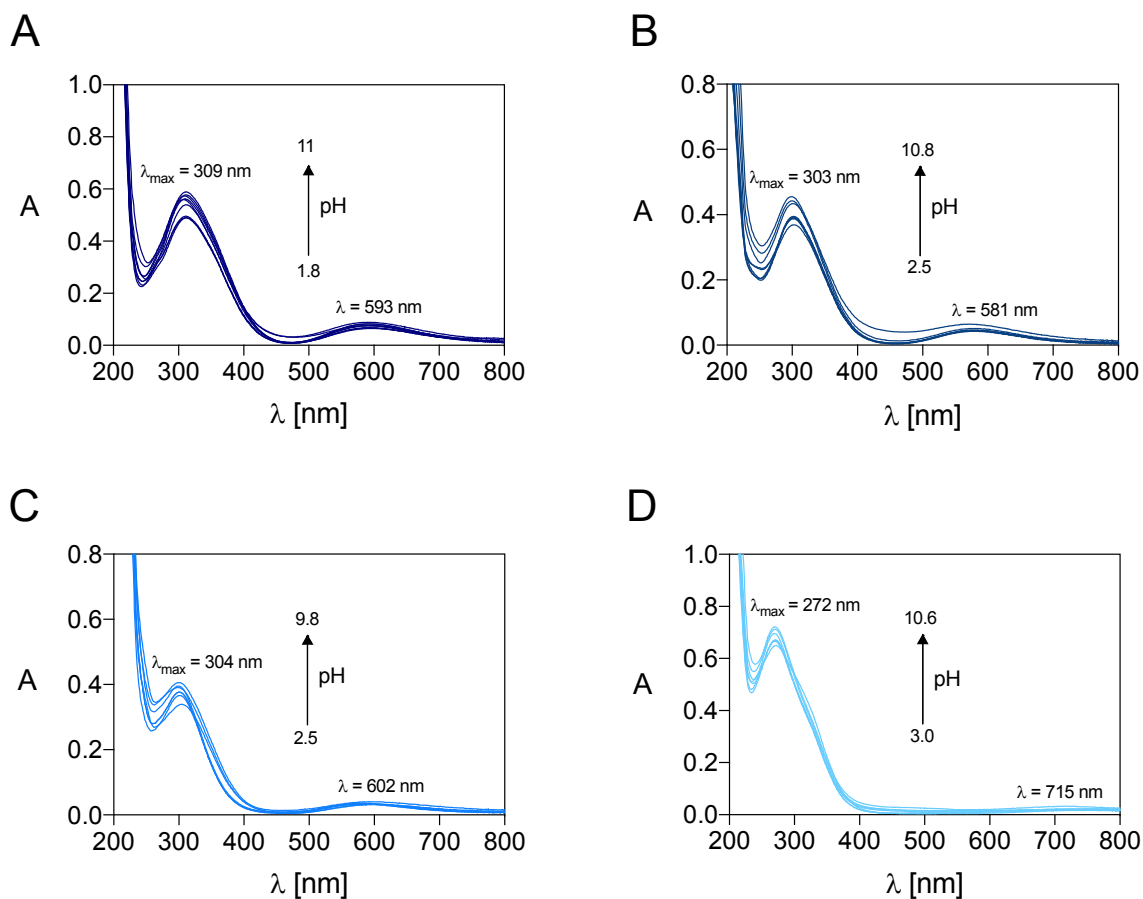

**Figure S8.** Selected UV-Vis spectra at pH > 2 of the  $\text{Cu}^{2+}$  complexes with (A) DO4S ( $C_{\text{Cu}^{2+}} = C_{\text{DO4S}} = 1.5 \cdot 10^{-4}$  mol/L), (B) DO3S ( $C_{\text{Cu}^{2+}} = C_{\text{DO3S}} = 1.1 \cdot 10^{-4}$  mol/L), (C) DO3SAm ( $C_{\text{Cu}^{2+}} = C_{\text{DO3SAm}} = 1.0 \cdot 10^{-4}$  mol/L) and (D) DO2A2S ( $C_{\text{Cu}^{2+}} = C_{\text{DO2A2S}} = 1.4 \cdot 10^{-4}$  mol/L) at  $I = 0.15$  mol/L NaCl and  $T = 25.0^\circ\text{C}$ .

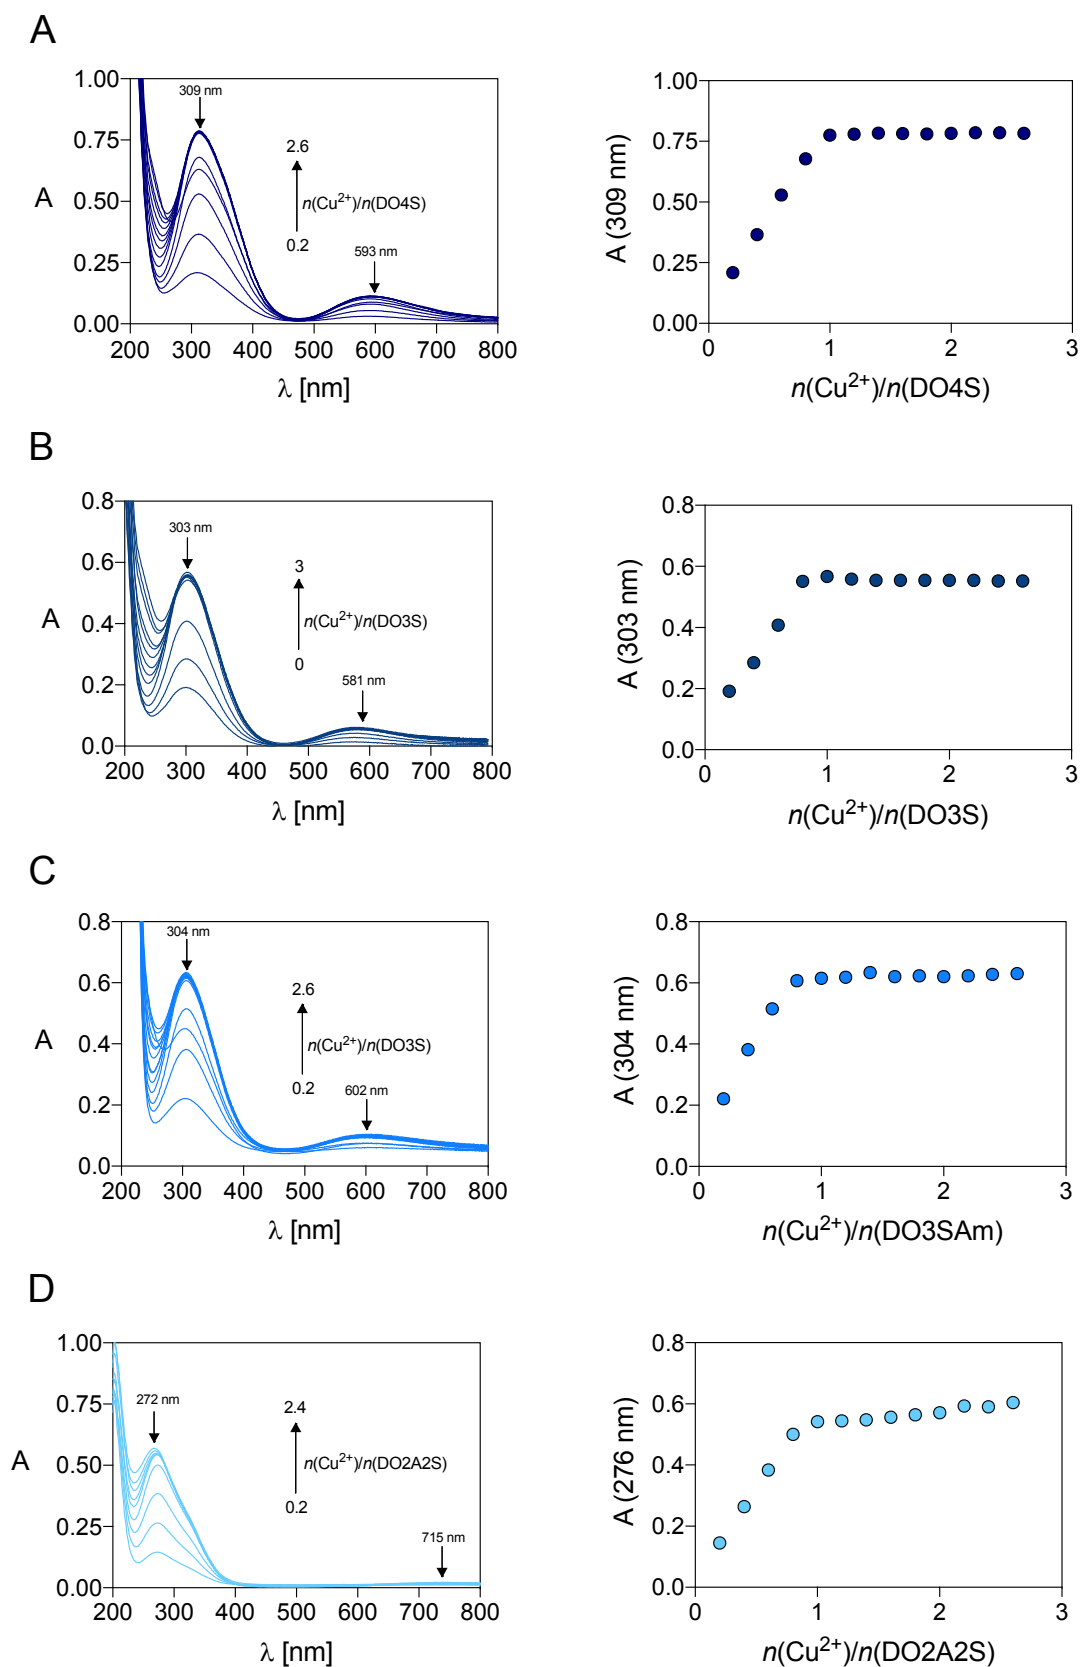

**Figure S9.** UV-Vis titrations by  $\text{Cu}^{2+}$  of solutions at pH 4.8 containing (A) DO4S ( $C_{\text{DO4S}} = 2.0 \cdot 10^{-4}$  mol/L), (B) DO3S ( $C_{\text{DO3S}} = 1.6 \cdot 10^{-4}$  mol/L), (C) DO3SAm ( $C_{\text{DO3SAm}} = 1.6 \cdot 10^{-4}$  mol/L) and (D) DO2A2S ( $C_{\text{DO2A2S}} = 1.2 \cdot 10^{-4}$  mol/L).

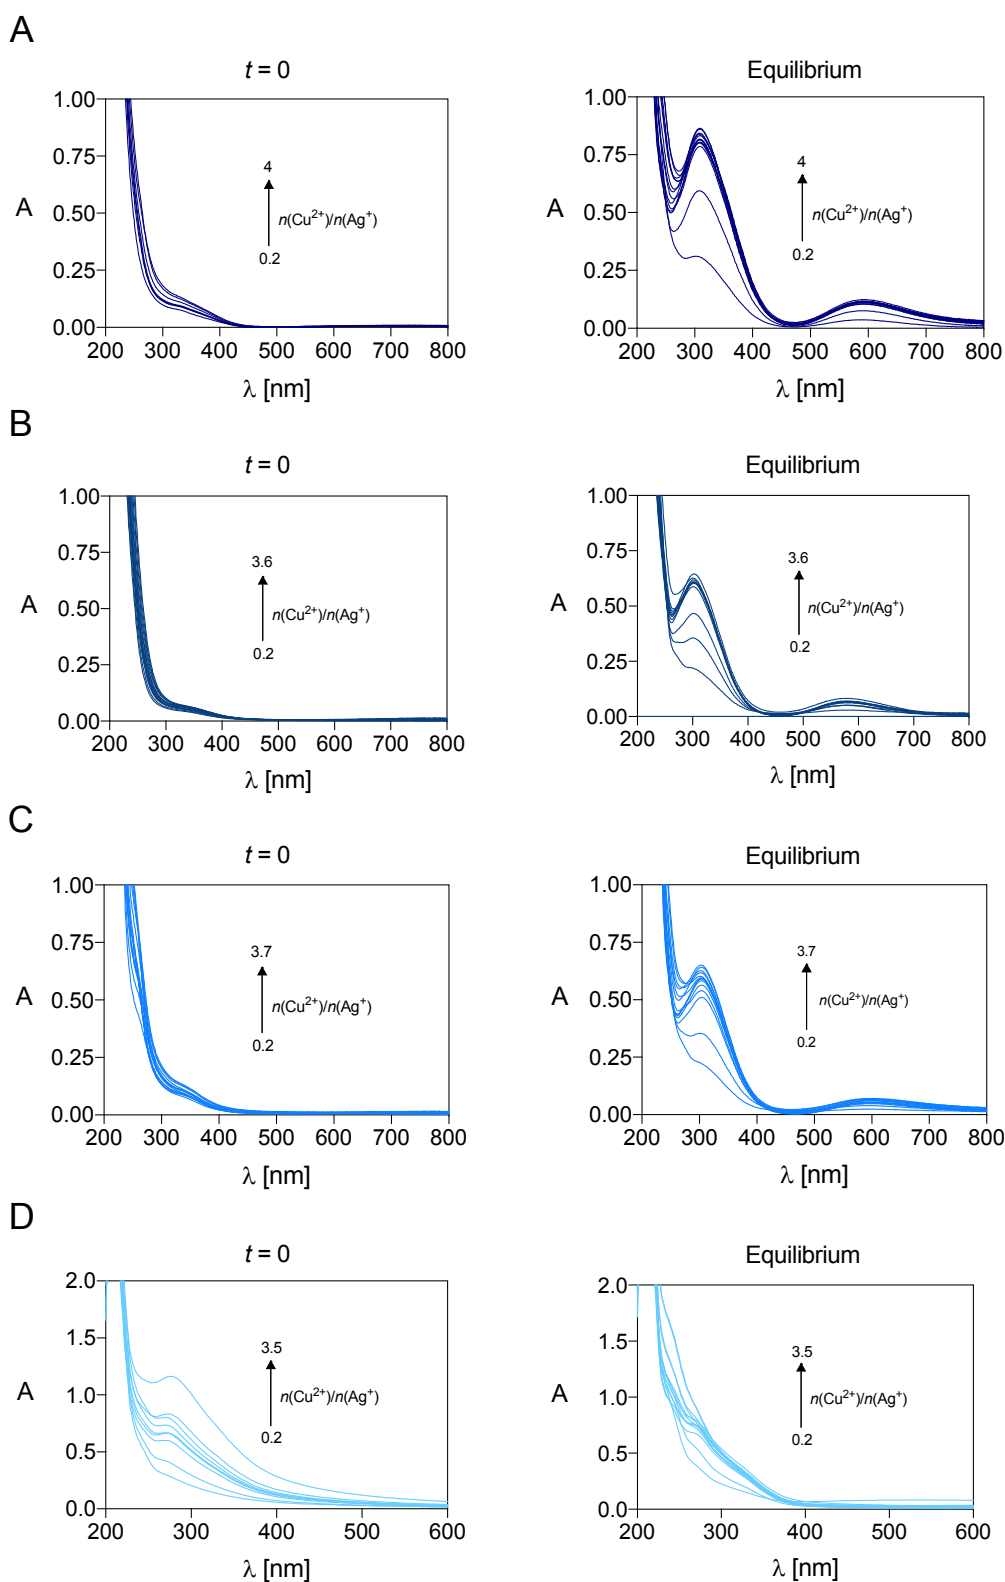

**Figure S10.** UV-Vis spectra at pH 4.8 of the preformed  $\text{Ag}^+$  complex with (A) DO4S ( $C_{\text{Ag}^+} = C_{\text{DO4S}} = 2.2 \cdot 10^{-4}$  mol/L), (B) DO3S ( $C_{\text{Ag}^+} = C_{\text{DO3S}} = 1.5 \cdot 10^{-4}$  mol/L), (C) DO3SAm ( $C_{\text{Ag}^+} = C_{\text{DO4S}} = 1.6 \cdot 10^{-4}$  mol/L) and (D) DO2A2S ( $C_{\text{Ag}^+} = C_{\text{DO4S}} = 1.2 \cdot 10^{-4}$  mol/L) immediately after the addition of variable equivalents of  $\text{Cu}^{2+}$  ( $t = 0$ ) and at equilibrium during the competition titrations.

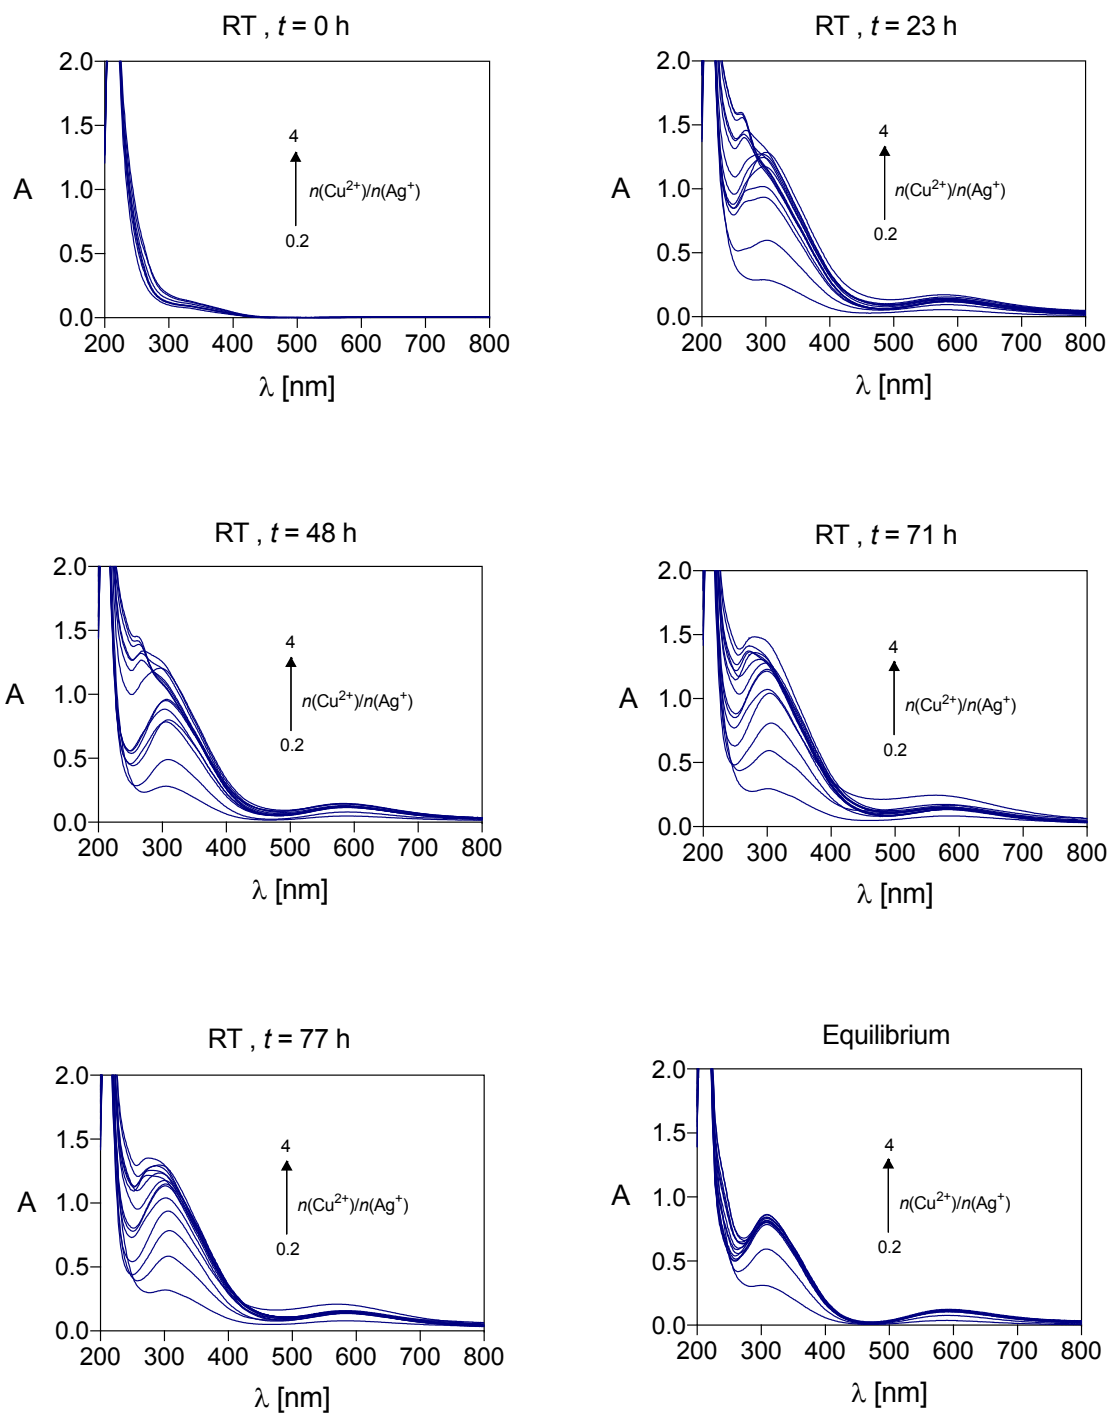

**Figure S11.** Changes in the UV-Vis spectra over time at pH 4.8 of the preformed Ag<sup>+</sup> complex with DO4S ( $C_{\text{Ag}^+} = C_{\text{DO4S}} = 2.2 \cdot 10^{-4}$  mol/L) during the Cu<sup>2+</sup> competition titrations.

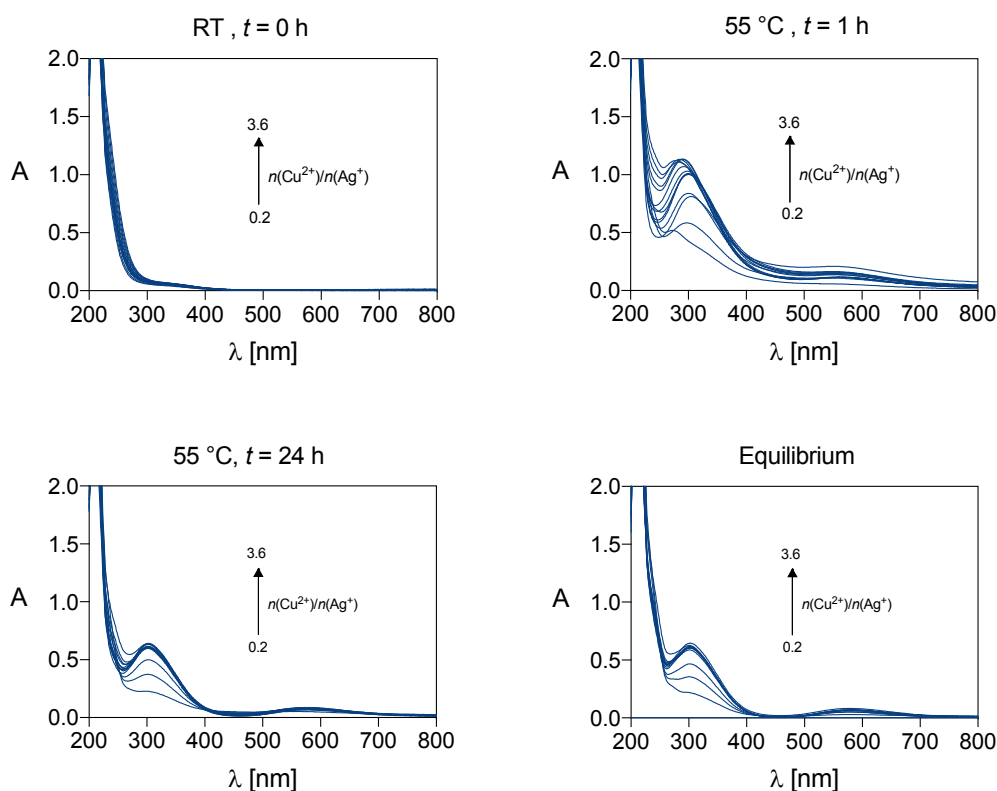

**Figure S12.** Changes in the UV-Vis spectra over time at pH 4.8 of the preformed  $\text{Ag}^+$  complex with DO3S ( $C_{\text{Ag}^+} = C_{\text{DO3S}} = 1.5 \cdot 10^{-4} \text{ mol/L}$ ) during the  $\text{Cu}^{2+}$  competition titrations.

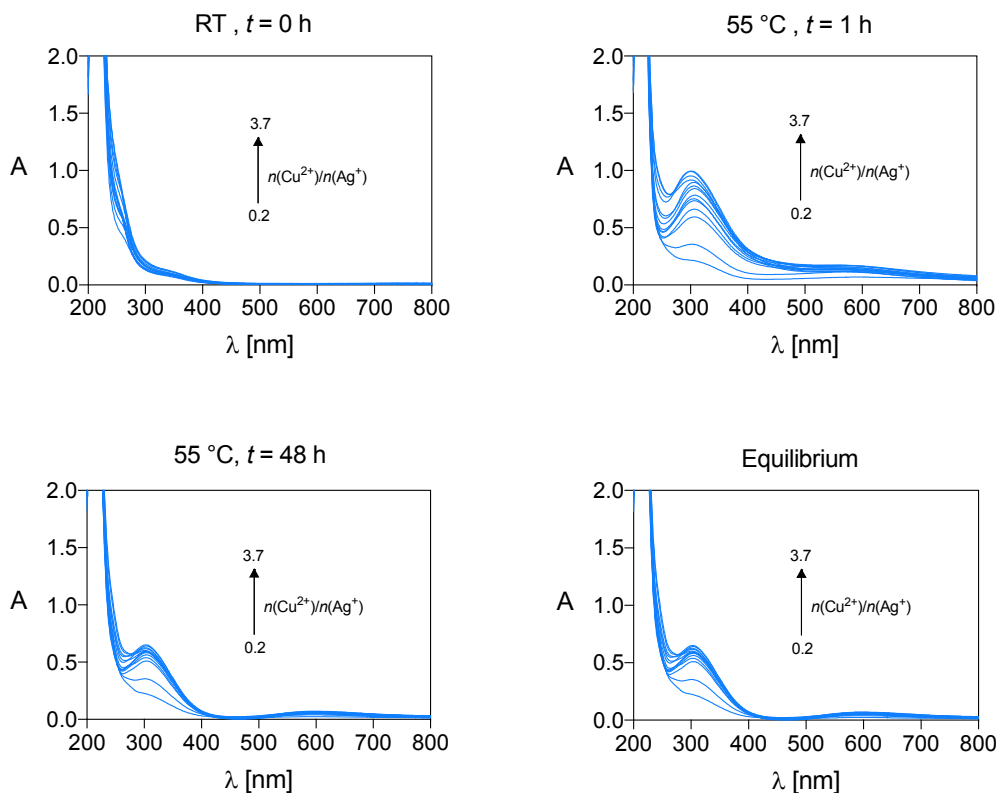

**Figure S13.** Changes in the UV-Vis spectra over time at pH 4.8 of the preformed  $\text{Ag}^+$  complex with DO3SAm ( $C_{\text{Ag}^+} = C_{\text{DO3SAm}} = 1.6 \cdot 10^{-4} \text{ mol/L}$ ) during the  $\text{Cu}^{2+}$  competition titrations.



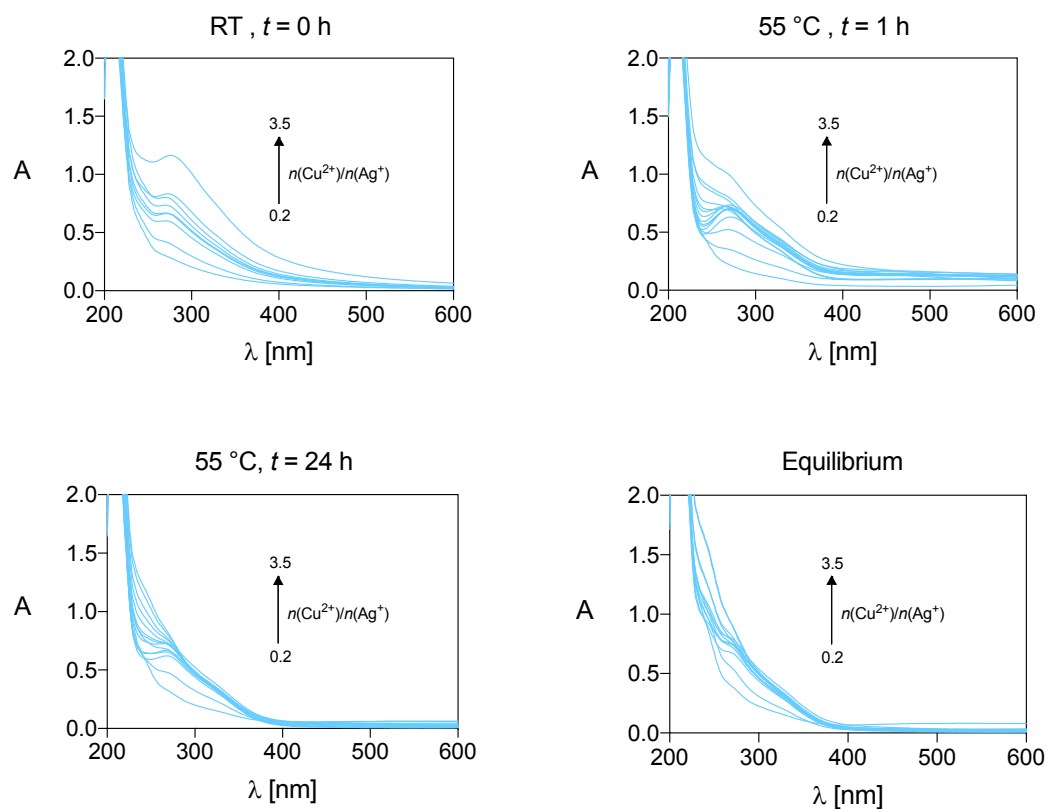

**Figure S14.** Changes in the UV-Vis spectra over time at pH 4.8 of the preformed  $\text{Ag}^+$  complex with DO2A2S ( $C_{\text{Ag}^+} = C_{\text{DO2A2S}} = 1.2 \cdot 10^{-4} \text{ mol/L}$ ) during the  $\text{Cu}^{2+}$  competition titrations.

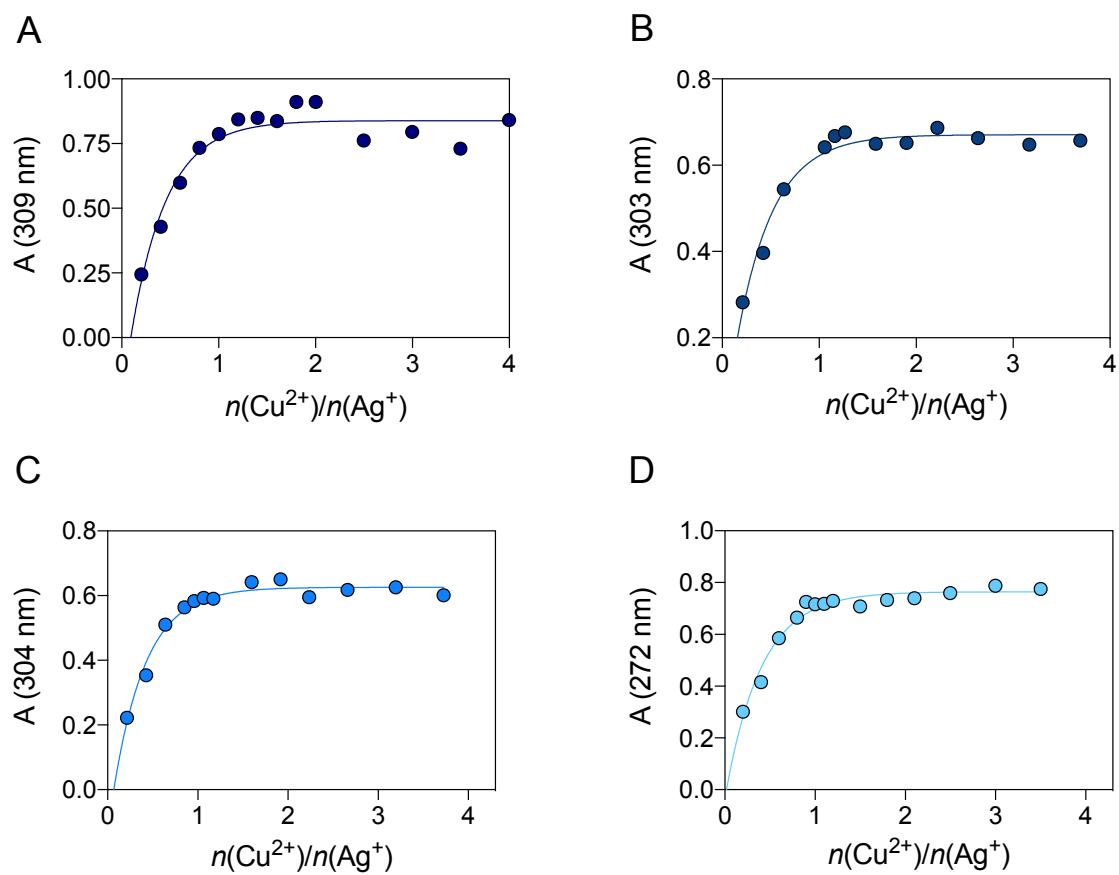

**Figure S15.** Representative  $A$  vs.  $n(\text{Cu}^{2+})/n(\text{Ag}^+)$  profiles obtained during the  $\text{Ag}^+$ - $\text{Cu}^{2+}$  competitions measurements (see **Figure S10**) and corresponding fitting lines.

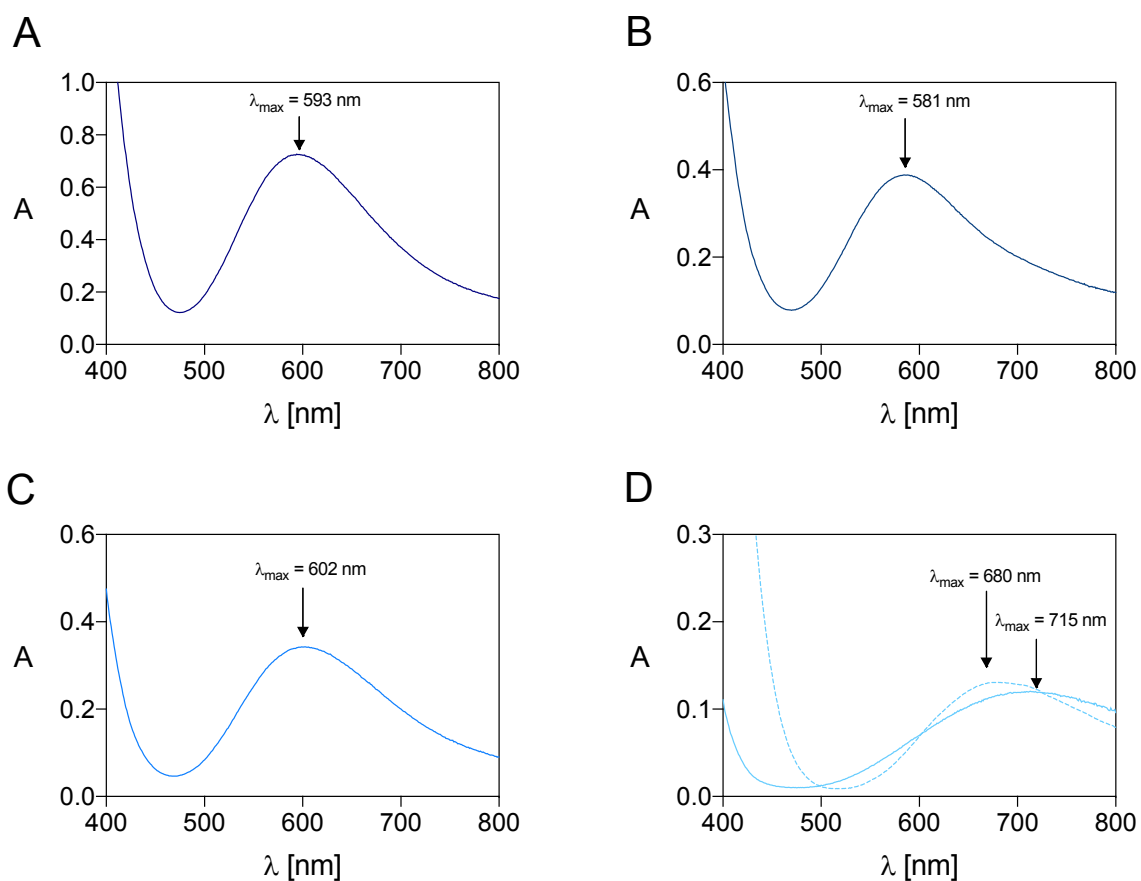

**Figure S16.** *d-d* band of the cupric complexes with (A) DO4S ( $C_{\text{Cu}^{2+}} = C_{\text{DO4S}} = 1.2 \cdot 10^{-3}$  mol/L), (B) DO3S ( $C_{\text{Cu}^{2+}} = C_{\text{DO3S}} = 9.2 \cdot 10^{-4}$  mol/L), (C) DO3SAm ( $C_{\text{Cu}^{2+}} = C_{\text{DO3SAm}} = 1.1 \cdot 10^{-3}$  mol/L) and (D) DO2A2S (pH 2.0,  $C_{\text{Cu}^{2+}} = C_{\text{DO2A2S}} = 7.8 \cdot 10^{-4}$  mol/L; pH 1.8 (dotted line),  $C_{\text{Cu}^{2+}} = C_{\text{DO2A2S}} = 9.0 \cdot 10^{-4}$  mol/L) at  $I = 0.15$  mol/L NaCl and  $T = 25.0$  °C.

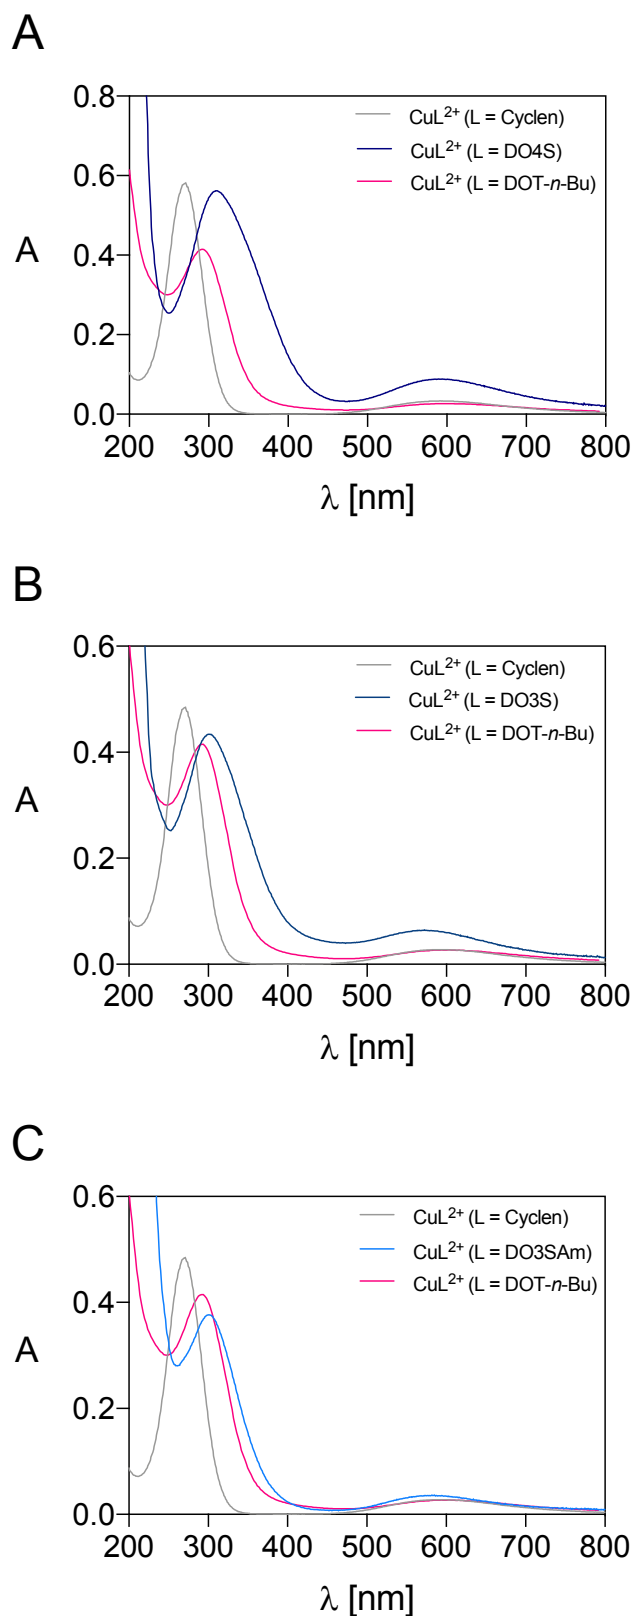

**Figure S17.** Comparison of the electronic spectra of the CuL<sup>2+</sup> complexes formed by (A) DO4S, (B) DO3S and (C) DO3SAm (data from **Figure S8**) with those of the same complex formed by cyclen ( $C_{\text{Cu}^{2+}} = C_{\text{cyclen}} = 1.5 \cdot 10^{-4}$  mol/L) and by DOT-*n*-Bu ( $C_{\text{Cu}^{2+}} = C_{\text{DOT-}n\text{-Bu}} = 2.1 \cdot 10^{-4}$  mol/L). The Cu<sup>2+</sup>-cyclen spectra obtained in this work agree with the literature data.<sup>5,6</sup>

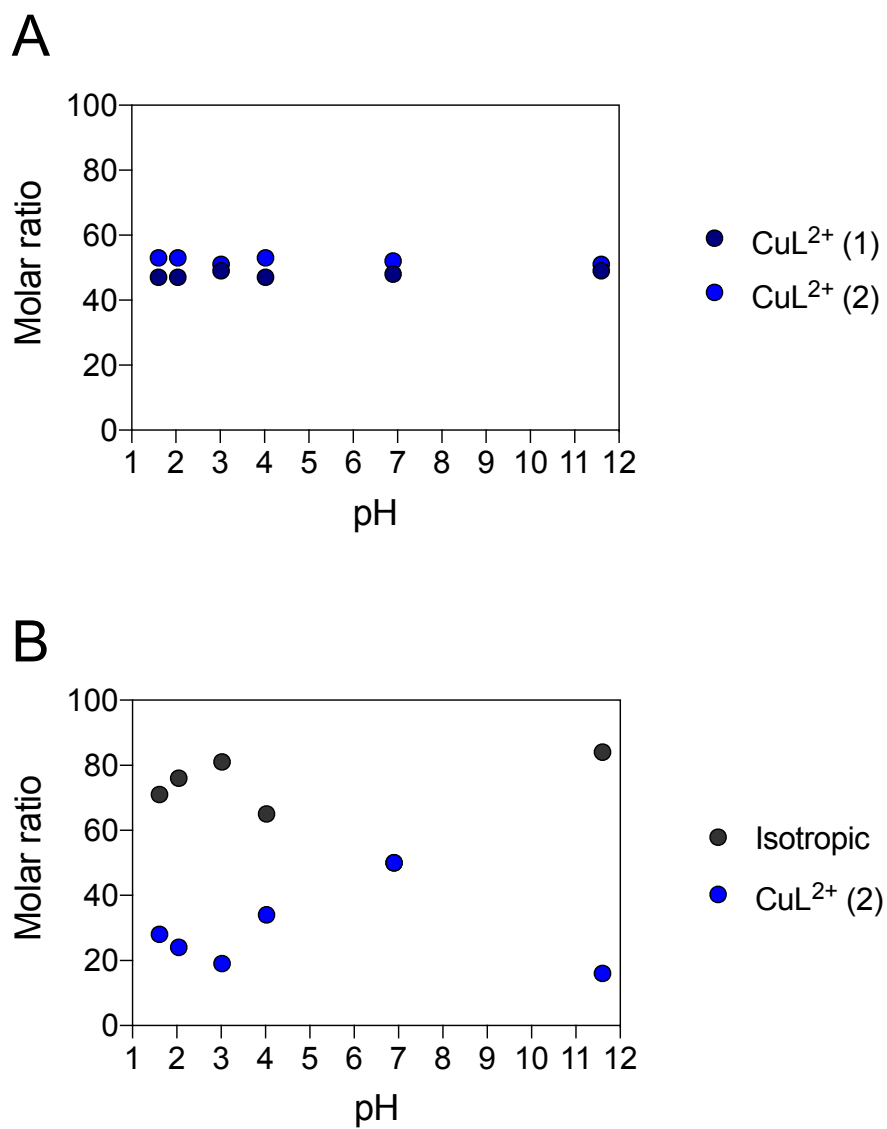

**Figure S18.** Component ratios obtained from the simulation of Cu<sup>2+</sup>-DO4S EPR spectra recorded at (A) room temperature and (B) 77 K.

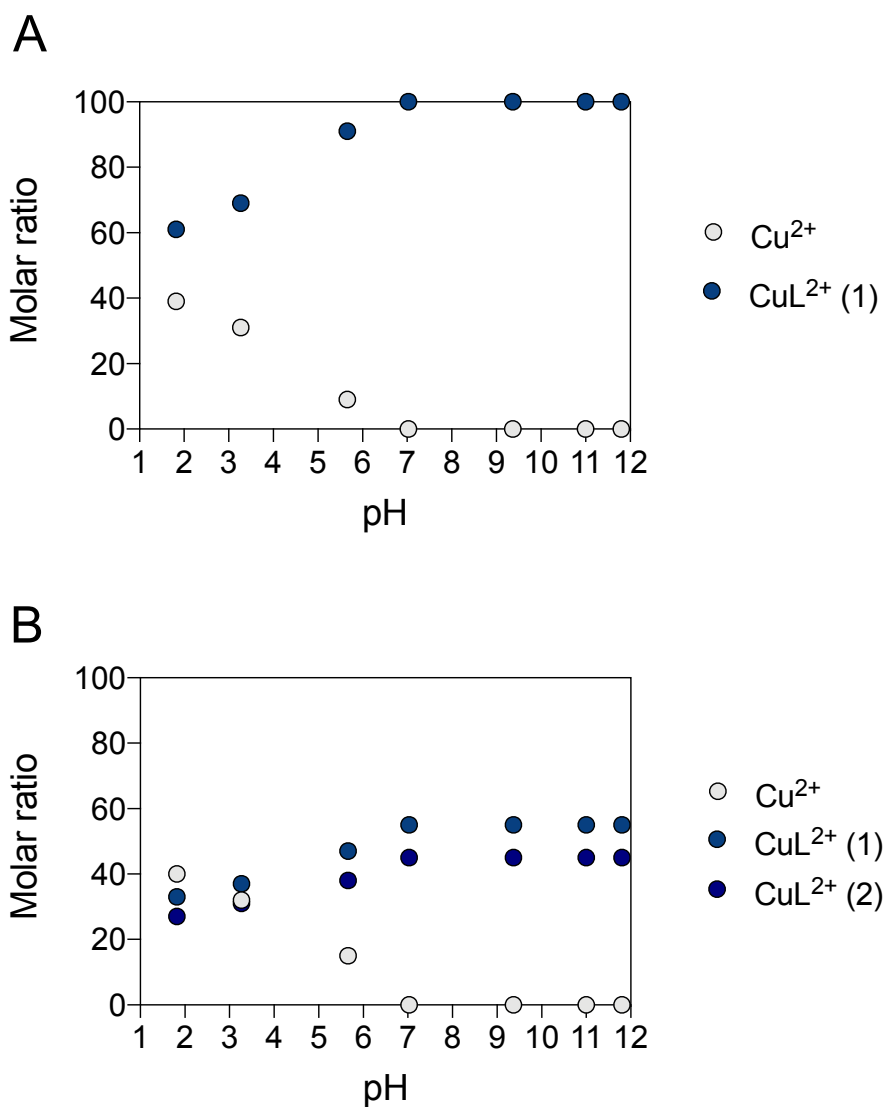

**Figure S19.** Component ratios obtained from the simulation of Cu<sup>2+</sup>-DO3S EPR spectra recorded at (A) room temperature and (B) 77 K.

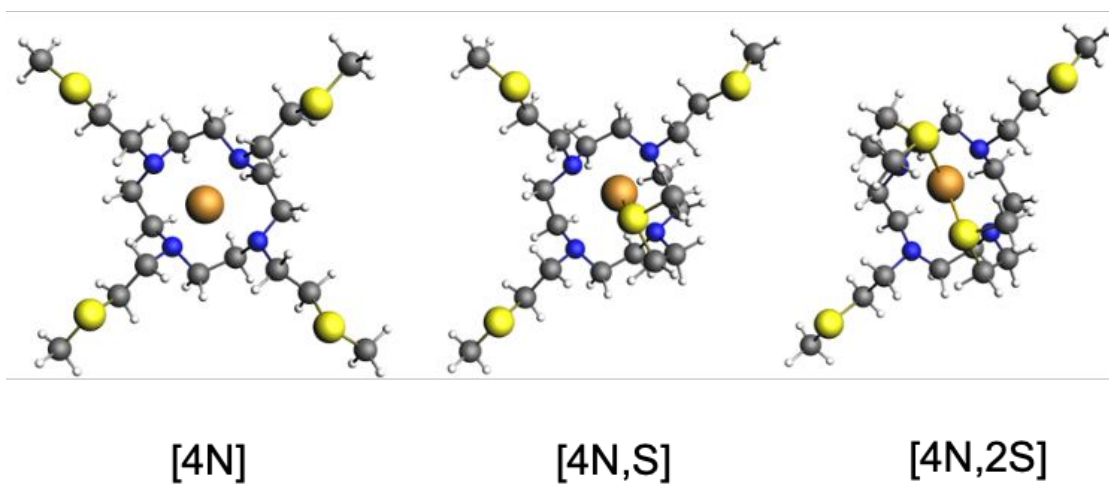

**Figure S20.** DFT-examined isomers of the CuL<sup>2+</sup> complex formed by DO4S.

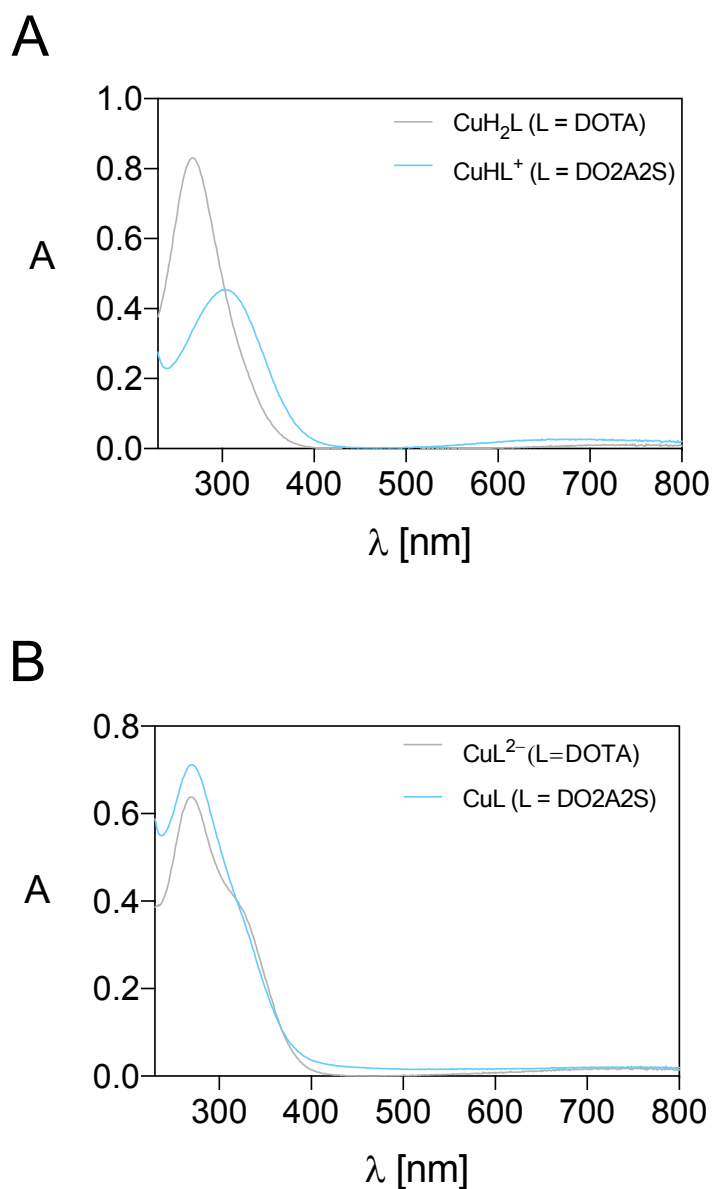

**Figure S21.** Comparison of the UV-Vis spectra of (A)  $\text{CuHL}^+$  for DO2A2S (data from **Figure 2**) and  $\text{CuH}_2\text{L}$  for DOTA ( $C_{\text{Cu}^{2+}} = C_{\text{DOTA}} = 2.0 \cdot 10^{-4}$  mol/L); (B)  $\text{CuL}$  for DO2A2S (data from **Figure S8**) and  $\text{CuL}^{2-}$  for DOTA ( $C_{\text{Cu}^{2+}} = C_{\text{DOTA}} = 2.0 \cdot 10^{-4}$  mol/L). The  $\text{Cu}^{2+}$ -DOTA spectra obtained in this work agree with the literature data.<sup>7</sup>

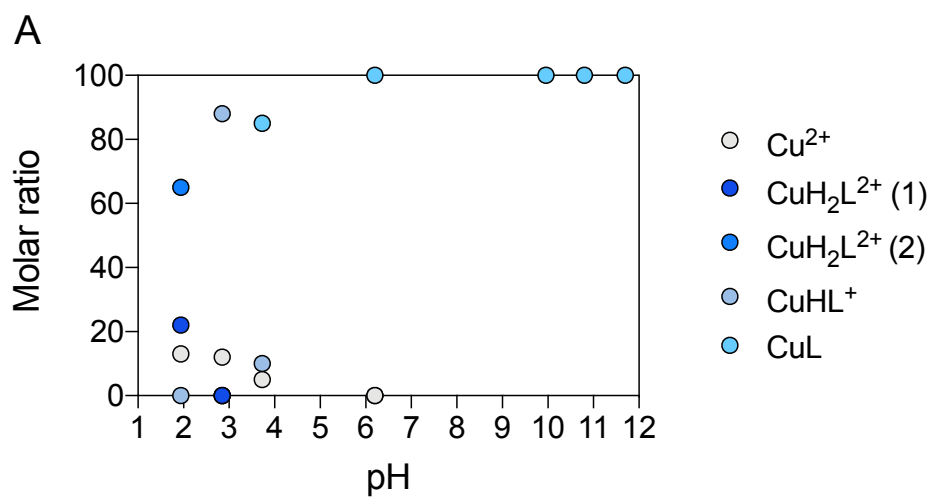

**Figure S22.** Component ratios obtained from the simulation of  $\text{Cu}^{2+}$ -DO2A2S EPR spectra recorded at 77 K.

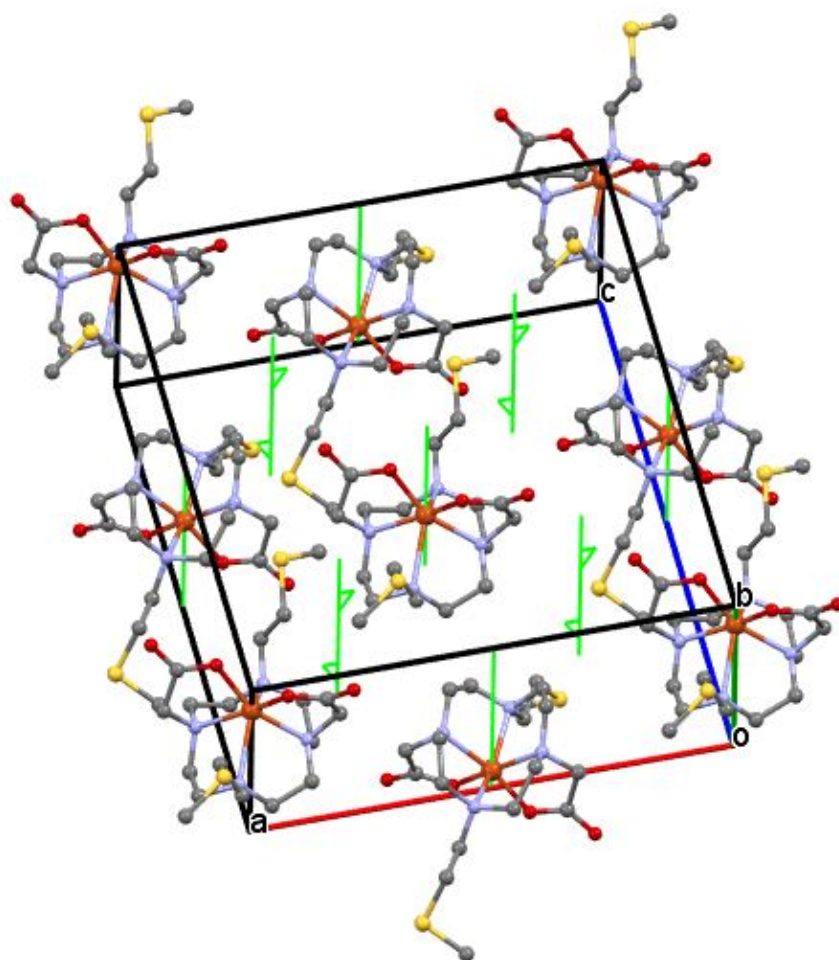

**Figure S23.** Unit cell of crystal  $[\text{Cu}(\text{DO2A2S})]$  showing the 2-fold rotation and screw axes.



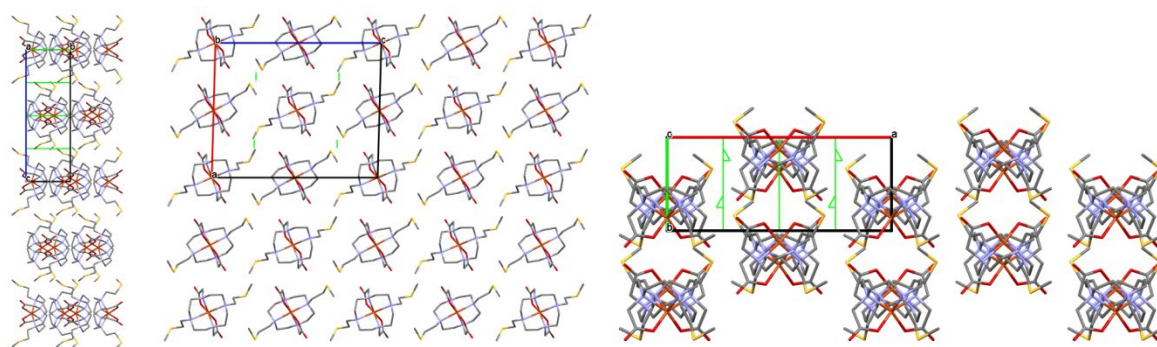

**Figure S24.** Packing arrangements in crystal [Cu(DO2A2S)] viewed from the crystallographic directions 'a', 'b' and 'c'.

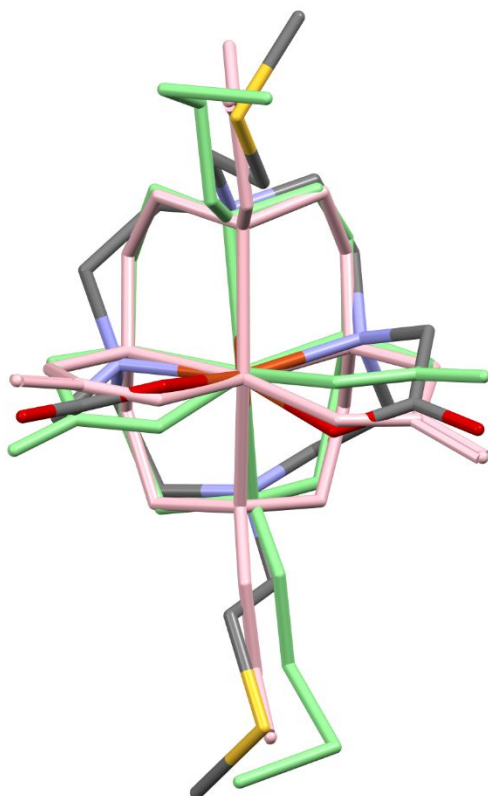

**Figure S25.** Comparison of the conformation of molecules in the asymmetrical unit of crystal [Cu(DO2A2S)] by overlay of the two molecules (molecule #1 is coloured by element, and #2 is green) together with crystal structure of Cu-DOTA (pink, Ref. Code FEKVAS).<sup>8</sup>

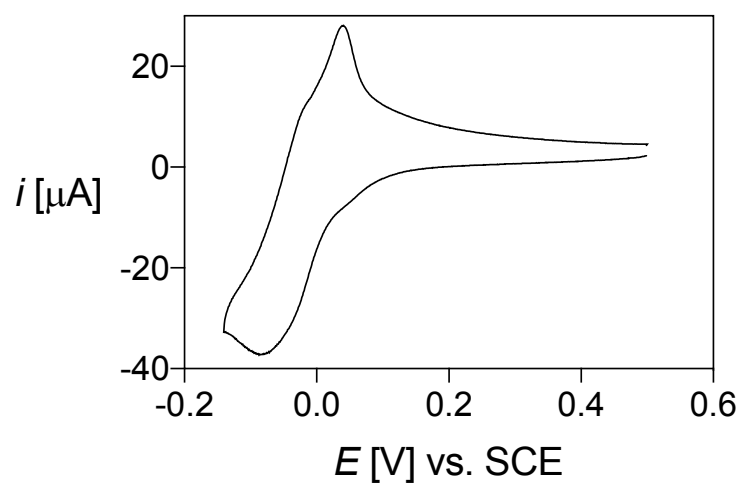

**Figure S26.** Cyclic voltammogram of unbound  $\text{Cu}^{2+}$  ( $C_{\text{Cu}^{2+}} = 2.3 \cdot 10^{-3}$  mol/L) in aqueous solution at pH 7,  $I = 0.15$  mol/L  $\text{NaNO}_3$  and  $T = 25$  °C, acquired at a scan rate of 0.1 V/s.

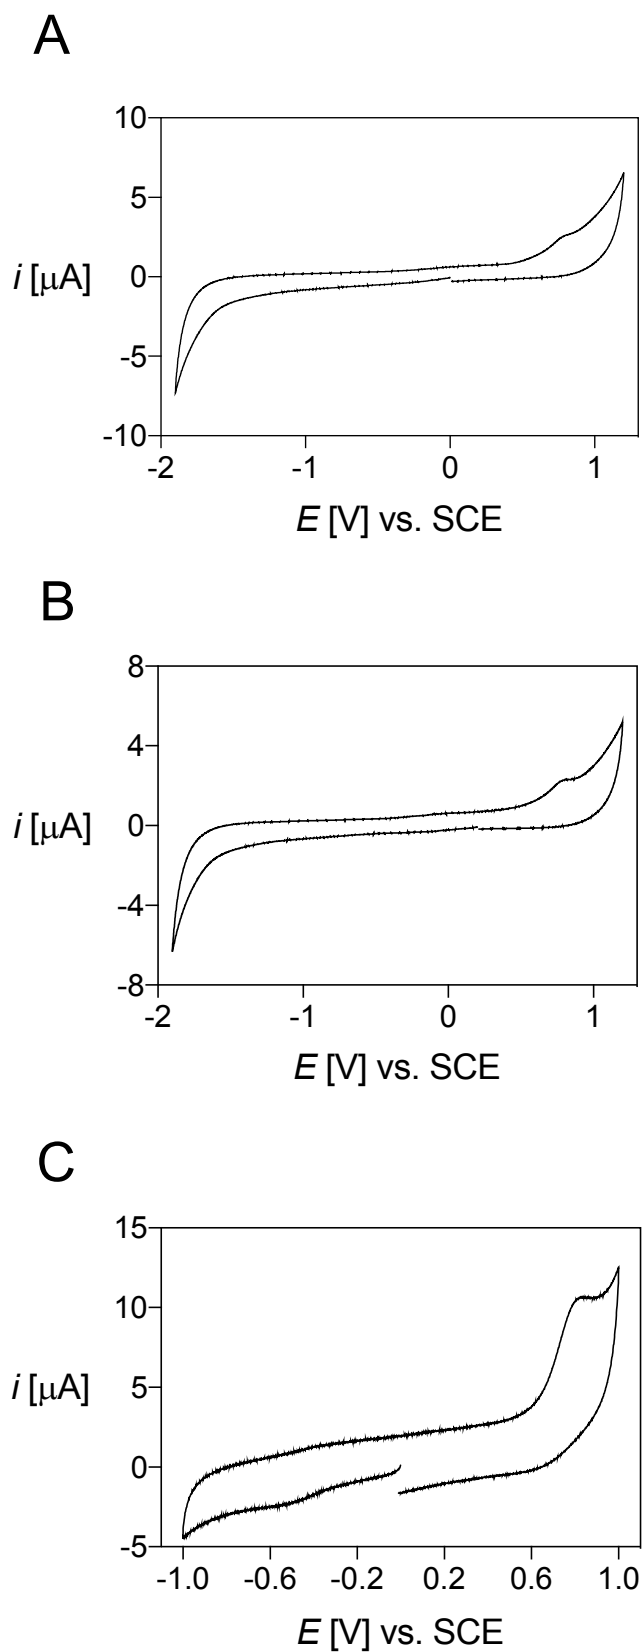

**Figure S27.** Cyclic voltammogram of (A) DO4S ( $C_{\text{DO4S}} = 1.0 \cdot 10^{-3}$  mol/L), (B) DO3S ( $C_{\text{DO3S}} = 1.1 \cdot 10^{-3}$  mol/L) and (C) DO2A2S ( $C_{\text{DO2A2S}} = 1.0 \cdot 10^{-3}$  mol/L) in aqueous solution at pH 7,  $I = 0.15$  mol/L  $\text{NaNO}_3$  and  $T = 25$  °C, acquired at a scan rate of 0.1 V/s.

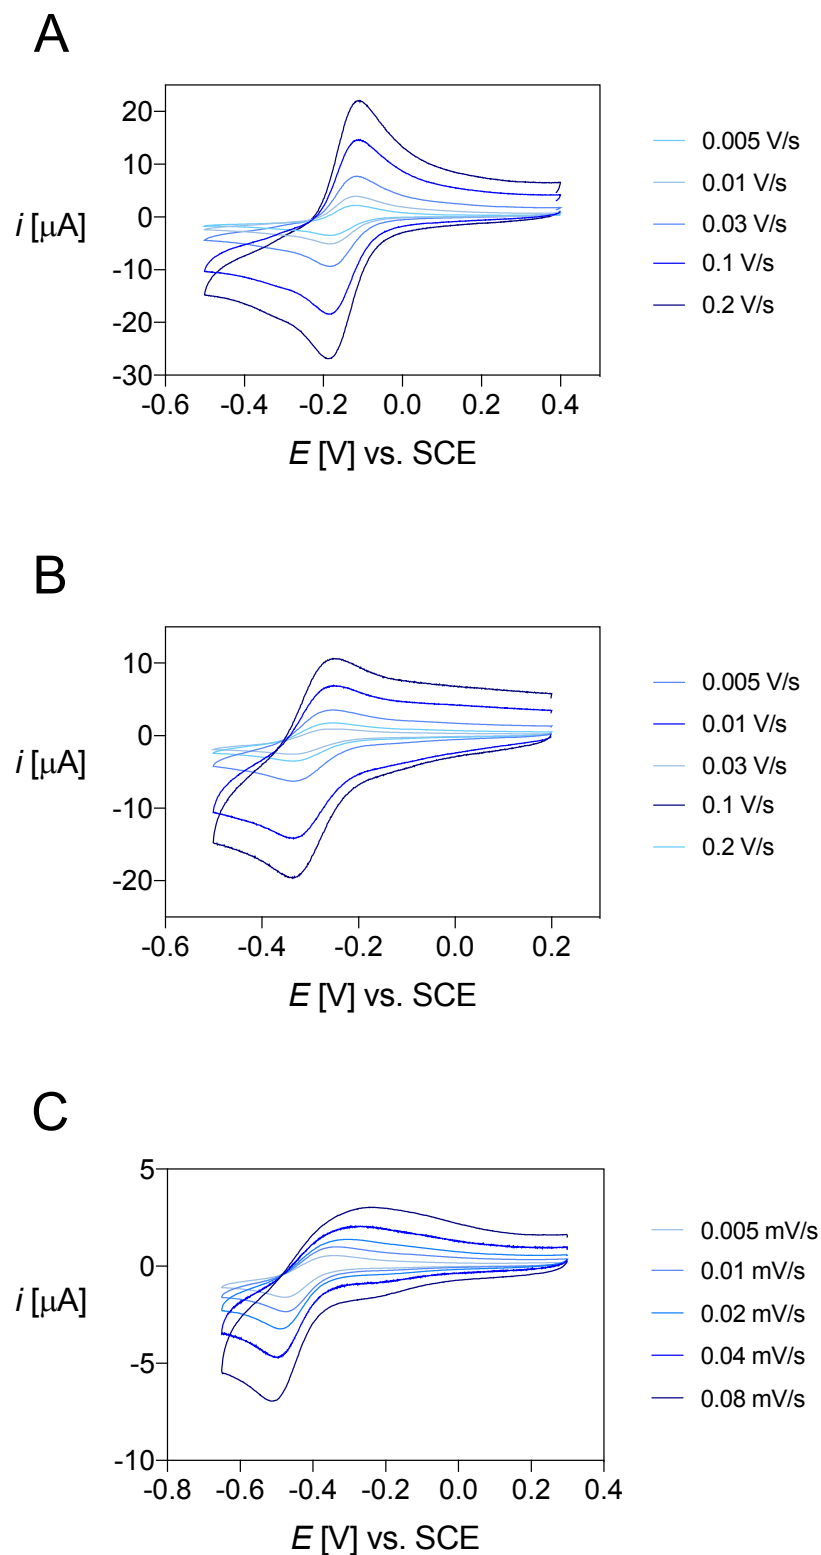

**Figure S28.** Cyclic voltammograms of copper complexes of (A) DO4S ( $C_{\text{CuL}^{2+}} = 1.0 \cdot 10^{-3}$  mol/L), (B) DO3S ( $C_{\text{CuL}^{2+}} = 1.1 \cdot 10^{-3}$  mol/L) and (C) DO2A2S ( $C_{\text{CuL}^{2+}} = 6.48 \cdot 10^{-4}$  mol/L) in aqueous solution at pH 7,  $I = 0.15$  mol/L  $\text{NaNO}_3$  and  $T = 25$  °C, acquired at different scan rates (0.005 - 0.2 V/s).

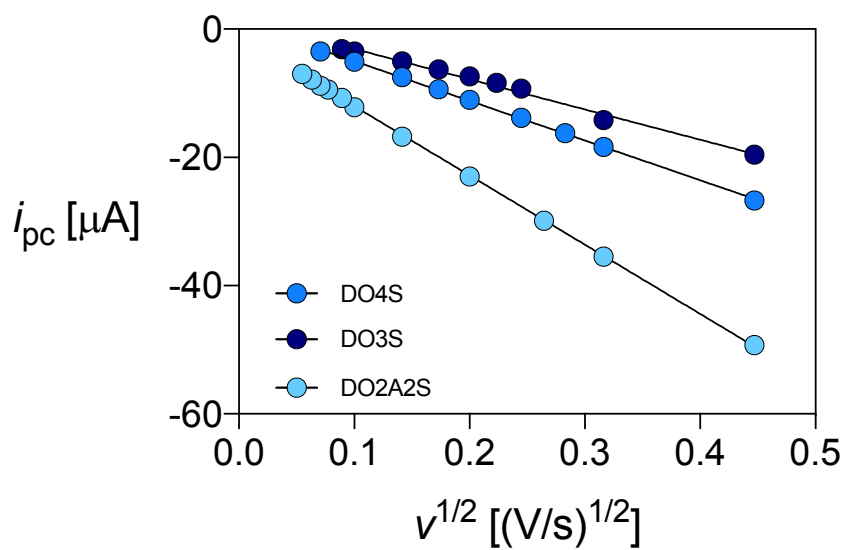

**Figure S29.** Variation of the cathodic current intensity ( $i_{pc}$ ) with the square root of the scan speed ( $v^{1/2}$ ) for the  $\text{Cu}^{2+}$  complexes of (A) DO4S, (B) DO3S and (C) DO2A2S, and linear regressions.

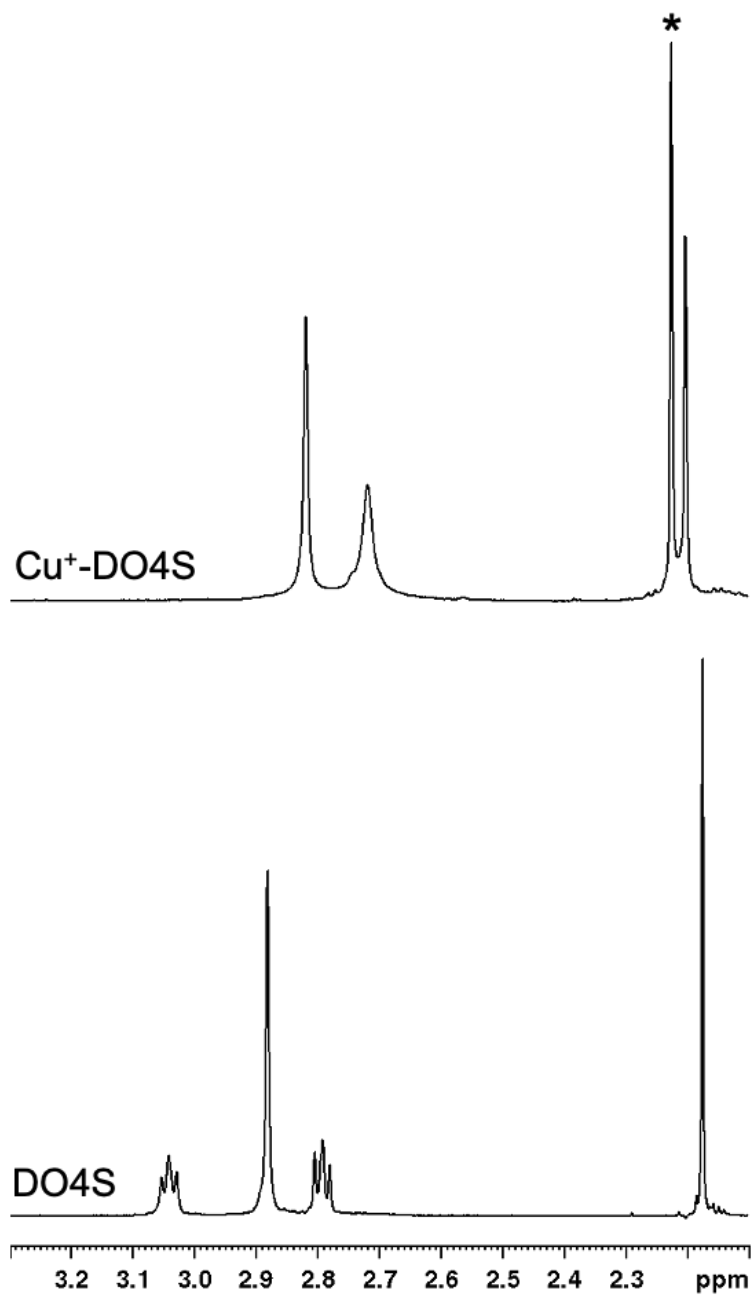

**Figure S30.** Comparison between the <sup>1</sup>H-NMR spectra of Cu<sup>+</sup>-DO4S (400 MHz, RT, H<sub>2</sub>O + 10% D<sub>2</sub>O) at pH 7 (data from **Figure 9**) and free monoprotonated DO4S (600 MHz, RT, D<sub>2</sub>O). Data for the latter were taken from our previous work.<sup>1</sup> The signal marked with an asterisk (2.22 ppm) is related to acetone impurity.

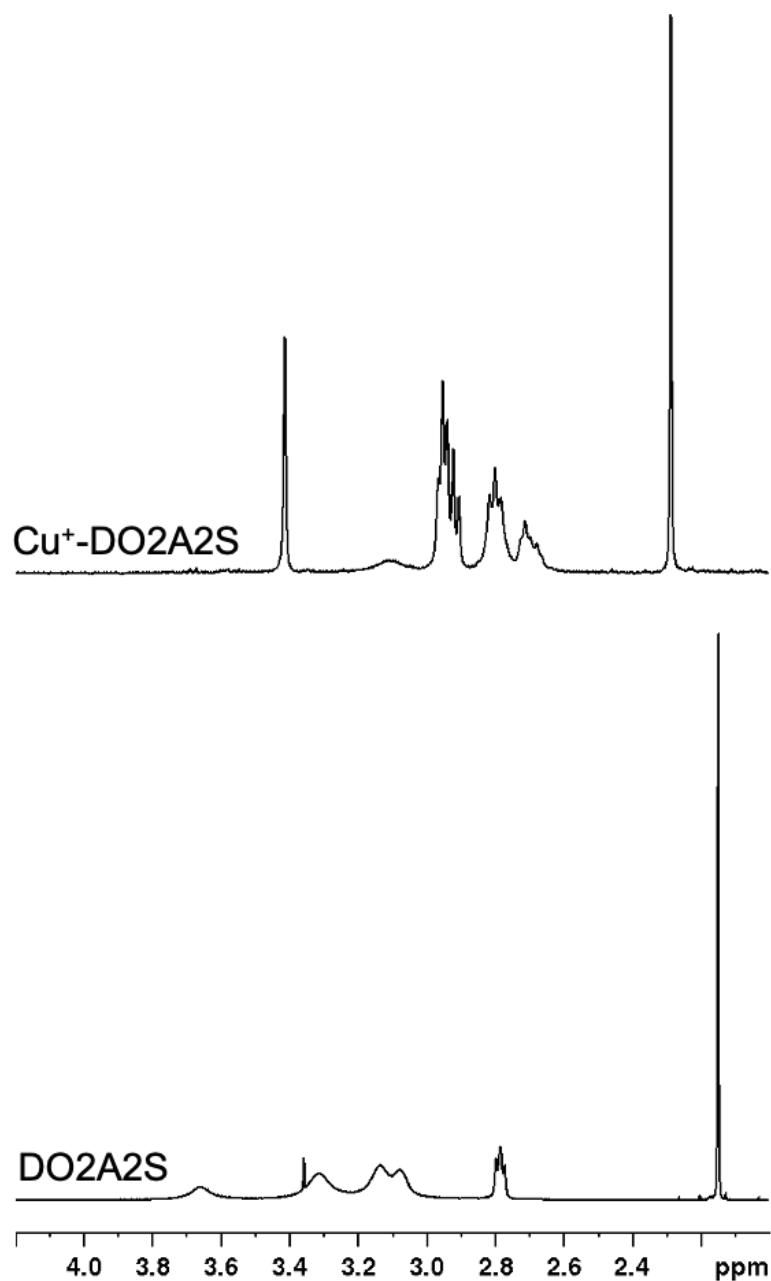

**Figure S31.** Comparison between the <sup>1</sup>H-NMR spectra of Cu<sup>+</sup>-DO2A2S (400 MHz, RT, H<sub>2</sub>O + 10% D<sub>2</sub>O) at pH 7 (data from **Figure 9**) and free monoprotonated DO2A2S (600 MHz, RT, D<sub>2</sub>O). Data for the latter were taken from our previous work.<sup>1</sup>

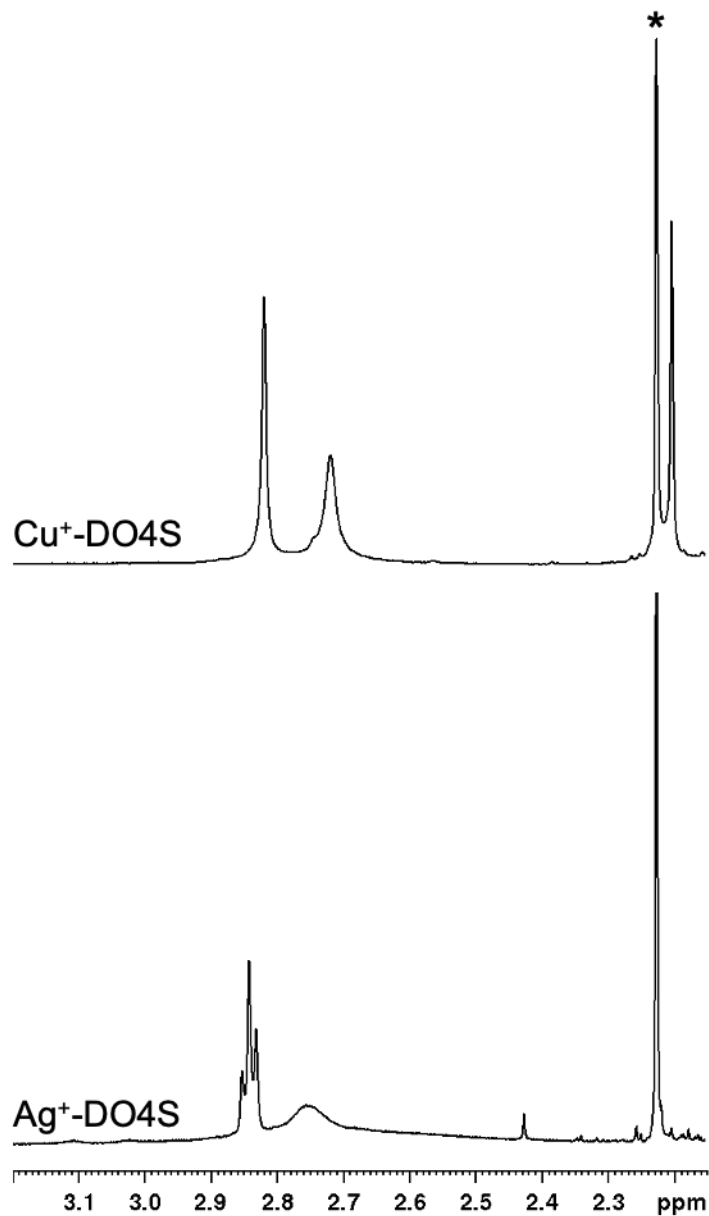

**Figure S32.** Comparison between the <sup>1</sup>H-NMR spectra of Cu<sup>+</sup>-DO4S (400 MHz, RT, H<sub>2</sub>O + 10% D<sub>2</sub>O) (data from **Figure 9**) and of Ag<sup>+</sup>-DO4S solutions (600 MHz, RT, D<sub>2</sub>O) at pH 7. Data for the latter were taken from our previous work.<sup>9</sup> The signal marked with an asterisk (2.22 ppm) is related to acetone impurity.



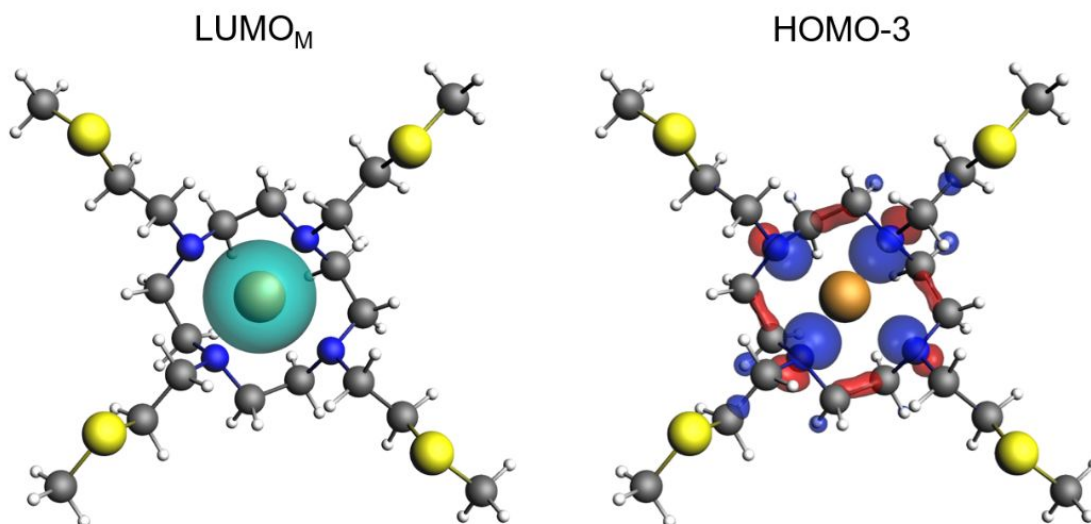

**Figure S33.** Main interacting symmetry-adapted fragment orbitals (SFOs) of the  $\text{Cu}^+$ -DO4S complex displaying a [4N] coordination mode.

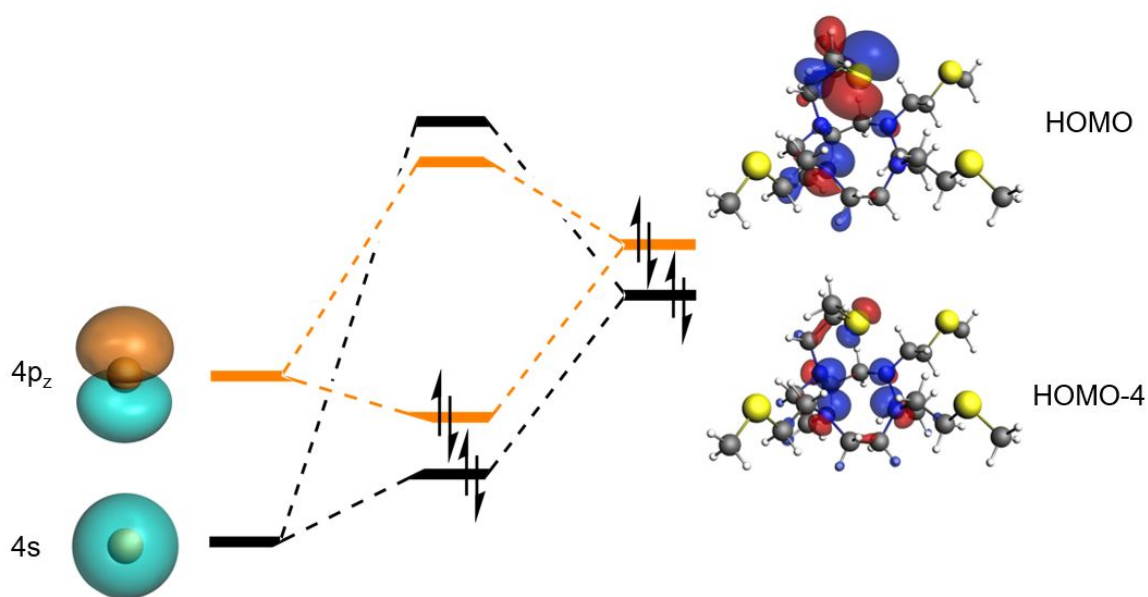

**Figure S34.** Molecular orbital diagram showing the two main bonding mode of the  $\text{Cu}^+$ -DO4S complex displaying a [4N,S] coordination mode. On the left, symmetry-adapted fragment orbitals (SFOs) representing the 4s and the  $4p_z$  orbitals located on the metal center. On the right, ligand SFOs involved in the primary (black) and secondary (orange) molecular bonding and antibonding orbital.

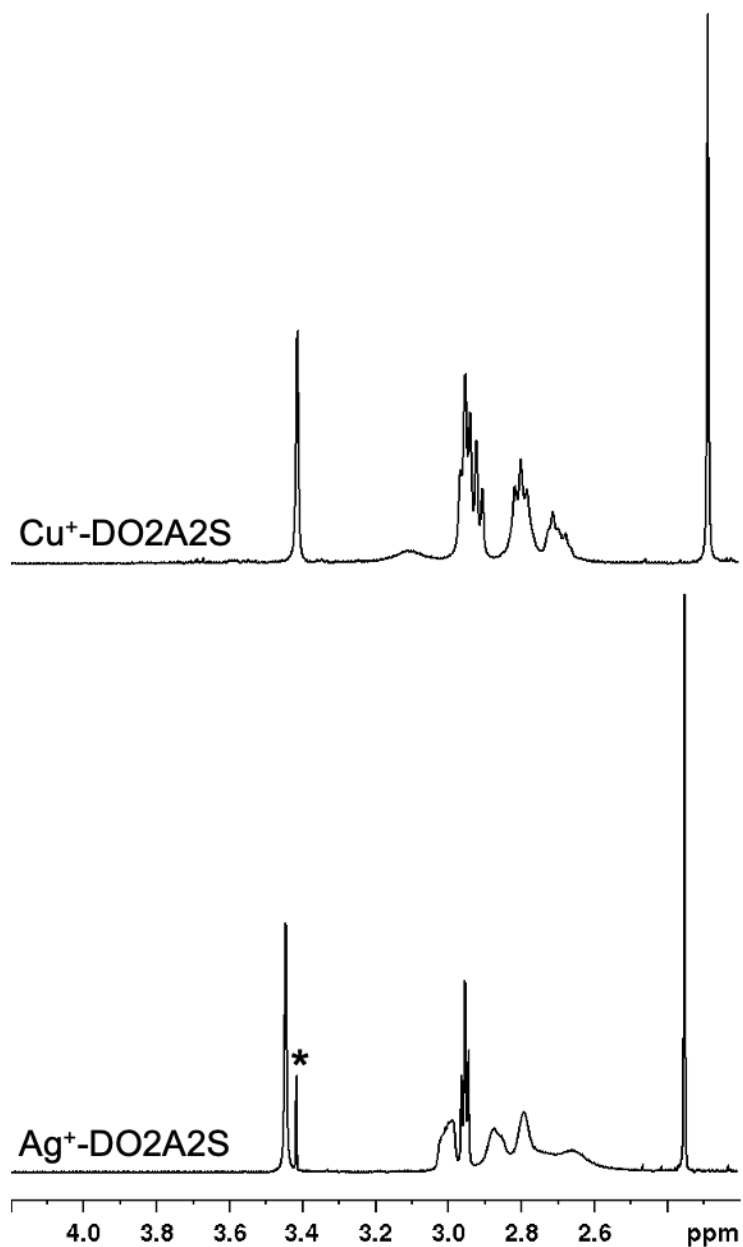

**Figure S35.** Comparison between the <sup>1</sup>H-NMR spectra of Cu<sup>+</sup>-DO2A2S (400 MHz, RT, H<sub>2</sub>O + 10% D<sub>2</sub>O) (data from **Figure 9**) and Ag<sup>+</sup>-DO2A2S (600 MHz, RT, D<sub>2</sub>O) at pH 7. Data for the latter were taken from our previous work.<sup>9</sup> The signal marked with an asterisk is related to methanol impurity.

### Determination of the stability constants of the Cu<sup>+</sup> complexes from voltammetric data

The relationship between the stability constants of the Cu<sup>2+</sup> and Cu<sup>+</sup> complexes with the ligand L was obtained using the following thermodynamic cycle:

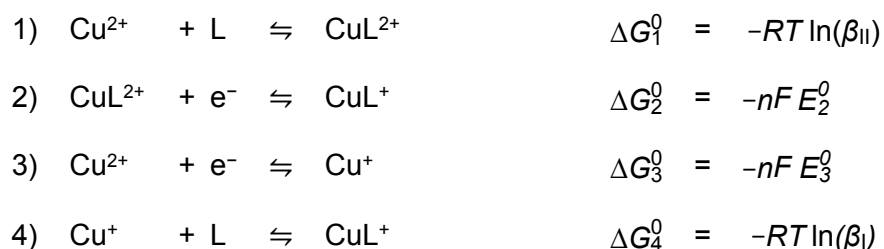

where  $n = 1$ ,  $\beta_{II}$  and  $\beta_I$  represent the formation constants of CuL<sup>2+</sup> and CuL<sup>+</sup>, respectively, and  $E_2^0$  is the standard potential for the unbound Cu<sup>2+</sup>/Cu<sup>+</sup> redox couple. It was assumed that the experimental  $E_{1/2}$  values approximate the standard potentials ( $E_3^0$ ).

The stability constants for the Cu<sup>+</sup> complexes were obtained from:

$$\Delta G_4^0 = \Delta G_1^0 + \Delta G_2^0 - \Delta G_3^0 \quad (6)$$

so that:

$$\ln(\beta_I) = \ln(\beta_{II}) + \frac{nF}{RT}(E_2^0 - E_3^0) \quad (7)$$

## Supplementary references

- (1) Tosato, M.; Verona, M.; Doro, R.; Dalla Tiezza, M.; Orian, L.; Andrighetto, A.; Pastore, P.; Marzaro, G.; Di Marco, V. Toward Novel Sulphur-Containing Derivatives of Tetraazacyclododecane: Synthesis, Acid–Base Properties, Spectroscopic Characterization, DFT Calculations, and Cadmium(II) Complex Formation in Aqueous Solution. *New J. Chem.* **2020**, *44* (20), 8337–8350.
- (2) Pniok, M.; Kubíček, V.; Havlíčková, J.; Kotek, J.; Sabatie-Gogová, A.; Plutnar, J.; Huclier-Markai, S.; Hermann, P. Thermodynamic and Kinetic Study of Scandium(III) Complexes of DTPA and DOTA: A Step Toward Scandium Radiopharmaceuticals. *Chem. Eur. J.* **2014**, *20* (26), 7944–7955.
- (3) Di Marco, V.; Pastore, P.; Tosato, M.; Andrighetto, A.; Borgna, F.; Realdon, N. pH-Static Titrations for Kinetic Studies of Metal-Ligand Complex Formation: The Case Example of the Reaction between Strontium(II) and DOTA. *Inorganica Chim. Acta* **2019**, *498*, 119147.
- (4) Leugger, A. P.; Hertli, L.; Kaden, T. A. Metal Complexes with Macrocyclic Ligands. Ring Size Effect on the Complexation Rates with Transition Metal Ions. *Helv. Chim. Acta* **1978**, *61* (7), 2296.
- (5) Styka, M. C.; Smierciak, R. C.; Blinn, E. L.; DeSimone, R. E.; Passariello, J. V. Copper(II) Complexes Containing a 12-Membered Macrocyclic Ligand. *Inorg. Chem.* **1978**, *17* (1), 82–86.
- (6) Lacerda, S.; Campello, M. P.; Santos, I. C.; Santos, I.; Delgado, R. Study of the Cyclen Derivative 2-[1,4,7,10-Tetraazacyclododecan-1-yl]-Ethanethiol and Its Complexation Behaviour towards d-Transition Metal Ions. *Polyhedron* **2007**, *26* (14), 3763–3773.
- (7) Ševčík, R.; Vanek, J.; Lubal, P.; Kotková, Z.; Kotek, J.; Hermann, P. Formation and Dissociation Kinetics of Copper(II) Complexes with Tetraphosphorus Acid DOTA Analogs. *Polyhedron* **2014**, *67*, 449–455.
- (8) Riesen, A.; Zehnder, M.; Kaden, T. A. Metal Complexes of Macrocyclic Ligands. Part XXIII. Synthesis, Properties, and Structures of Mononuclear Complexes with 12- and 14-membered Tetraazamacrocycle-*N,N',N'',N'''*-tetraacetic Acids. *Helv. Chim. Acta* **1986**, *69* (8), 2067–2073.
- (9) Tosato, M.; Asti, M.; Dalla Tiezza, M.; Orian, L.; Häussinger, D.; Vogel, R.; Köster, U.; Jensen, M.; Andrighetto, A.; Pastore, P.; Di Marco, V. Highly Stable Silver(I) Complexes with Cyclen-Based Ligands Bearing Sulfide Arms: A Step Toward Silver-111 Labeled Radiopharmaceuticals. *Inorg. Chem.* **2020**, *59* (15), 10907–10919.
